# Structure-Function analysis of *Lactiplantibacillus plantarum* DltE reveals D-alanylated lipoteichoic acids as direct symbiotic cues supporting *Drosophila* juvenile growth

5

Nikos Nikolopoulos<sup>1,\*</sup>, Renata C. Matos<sup>2,\*</sup>, Stéphanie Ravaud<sup>1,\*</sup>, Pascal Courtin<sup>3,\*</sup>, Houssam Akherraz<sup>2</sup>, Simon Palussière<sup>3</sup>, Virginie Gueguen-Chaignon<sup>4</sup>, Marie Salomon-Mallet<sup>3</sup>, Alain Guillot<sup>3</sup>, Yann Guerardel<sup>5,6</sup>, Marie-Pierre Chapot-Chartier<sup>3,#</sup>, Christophe Grangeasse<sup>1,#</sup> and François Leulier<sup>2,#</sup>

10 \*Equal contribution, #Shared senior authorship

Correspondence: [francois.leulier@ens-lyon.fr](mailto:francois.leulier@ens-lyon.fr), [christophe.grangeasse@ibcp.fr](mailto:christophe.grangeasse@ibcp.fr), [marie-pierre.chapot-chartier@inrae.fr](mailto:marie-pierre.chapot-chartier@inrae.fr)

15 <sup>1</sup> Molecular Microbiology and Structural Biochemistry, CNRS UMR 5086, Université Claude Bernard Lyon 1, Lyon, France.

<sup>2</sup> Institut de Génomique Fonctionnelle de Lyon, Ecole Normale Supérieure de Lyon, CNRS UMR 5242, Université Claude Bernard Lyon 1, Lyon, France

20 <sup>3</sup> Université Paris-Saclay, INRAE, AgroParisTech, Micalis Institute, Jouy-en-Josas, France

<sup>4</sup> Protein Science Facility, CNRS UAR3444, INSERM US8, Université Claude Bernard Lyon 1, Ecole Normale Supérieure de Lyon, Lyon, France

25

<sup>5</sup> Univ. Lille, CNRS, UMR 8576 - UGSF - Unité de Glycobiologie Structurale et Fonctionnelle, F-59000 Lille, France

<sup>6</sup> Institute for Glyco-core Research (iGCORE), Gifu University, Gifu, Japan

30

## Abstract

35

Metazoans establish mutually beneficial interactions with their resident microorganisms. However, our understanding of the microbial cues contributing to host physiology remains elusive. Previously, we identified a bacterial machinery encoded by the *dlt* operon involved in *Drosophila melanogaster*'s juvenile growth promotion by *Lactiplantibacillus plantarum*. Here,

40

using crystallography combined with biochemical and cellular approaches, we investigate the physiological role of an uncharacterized protein (DltE) encoded by this operon. We show that LTAs but not WTAs are D-alanylated in *Lactiplantibacillus plantarum*<sup>NC8</sup> cell envelope and demonstrate that DltE is a D-Ala carboxyesterase removing D-Ala from LTA. Using the mutualistic association of *L. plantarum*<sup>NC8</sup> and *Drosophila melanogaster* as a symbiosis model,

45

we establish that D-Ala-LTAs are direct symbiotic cues supporting intestinal peptidase expression and juvenile growth in *Drosophila*. Our results pave the way to probing the contribution of D-Ala-LTA to host physiology in other symbiotic models.

## Introduction

50

Metazoans establish mutually beneficial interactions with their resident microorganisms<sup>1</sup>. These interactions contribute to different aspects of host physiology including juvenile growth, a post-natal developmental process marked by rapid body-size increase and organ maturation<sup>2</sup>. Juvenile growth results from the integration of environmental cues with the organism's intrinsic genetic potential, driven by energy and nutritional demands. Harsh environmental conditions, notably nutrient deprivation, result in linear and ponderal growth failure (i.e stunting)<sup>3</sup> as well as alteration in gut microbiota maturation<sup>4</sup> which can be mitigated by microbial interventions and/or microbiota-directed nutritional interventions<sup>5</sup>. Despite some recent advances, the understanding of how gut microbes buffer the deleterious effect of undernutrition and contribute to healthy juvenile growth remains elusive.

60

*Drosophila melanogaster* (referred here as *Drosophila*) is a valuable experimental model to study the physiological consequences and underlying mechanisms of host-commensal bacteria interactions<sup>6,7</sup>. Bacterial strains associated with *Drosophila* influence multiple physiological processes including juvenile growth, and in several occasions, the underlying symbiotic cues, i.e. bacterial molecules directly impacting host functionalities, has been identified. For instance, amino acids produced by symbiotic bacteria can inhibit the production of the neuropeptide CNMamide in the gut, which shape food foraging behavior by repressing preference for amino acids<sup>8</sup>. Bacterial metabolite such as acetate produced by strains of *Ap* is necessary to support juvenile growth<sup>9</sup> by altering the epigenome of enteroendocrine cells and stimulating the secretion of the intestinal hormone Tachykinin<sup>10,11</sup>. In the context of microbe-mediated *Drosophila* juvenile growth promotion<sup>12</sup>, peptidoglycan (PG) fragments from *Lp* cell walls are directly sensed by PeptidoGlycan Recognition Receptors (PGRPs) in *Drosophila* enterocytes. This recognition signal, via the IMD/NF-kappaB pathway, promote the production of intestinal peptidases which helps juveniles optimizing the assimilation of dietary proteins to support their systemic growth<sup>13</sup>.

70

75

Recently, in an effort to further characterize the bacterial machinery involved in *Lp*-mediated juvenile growth promotion, we identified through forward genetic screening the *pbpX2-dltXABCD* operon as an important determinant of *Lp*-induced *Drosophila* larval growth<sup>14</sup>. The first gene of the operon, *pbpX2* (here renamed *dltE* for D-Ala-LTA Esterase, see below), is uncharacterized and annotated as a serine-type D-Ala-D-Ala-carboxypeptidase putatively involved in PG maturation cleaving the terminal D-Ala residue of the peptide stem in newly made muropeptides. Remarkably, *Lp* peptidoglycan precursors do not contain a

80

terminal D-Ala in peptide stems but a terminal D-lactate (D-Lac)<sup>15</sup> raising the question of the biochemical activity of DltE. On the other hand, the remaining *dltABCD* encode a multi-protein  
85 machinery responsible for the D-alanylation of Teichoic Acids (TA) in diverse gram-positive bacteria<sup>16</sup> and in *Lp*<sup>17</sup>. TAs are anionic polymers localized within the gram-positive bacteria cell wall, representing up to 50% of the cell envelope dry weight and present in two forms: Wall-TA (WTA) which are covalently bound to PG and Lipo-TA (LTA) which are anchored to the cytoplasmic membrane<sup>18</sup>. Study of a *Lp*<sup>NC8</sup> isogenic strain deleted for the entire *dlt* operon  
90 revealed that this operon is indeed essential to D-Ala esterification to the cell envelope (most likely on TAs) and that purified D-alanylated cell envelopes triggered intestinal peptidase expression and support *Drosophila* juvenile growth<sup>14</sup>. These results suggested that TA modifications are important symbiotic cues shaping commensal-host molecular dialog. However, which type of TAs and whether their modification is directly involved remains  
95 unaddressed and an indirect influence of the D-alanylation process on PG maturation and PG sensing by the host could not be excluded.

To address these standing questions, we investigate here the structure, the biochemical activity and the physiological role of DltE. We also study the impact of DltE on TA structure and modifications in *Lp* cell envelope and test the relative contribution of purified PG, WTA  
100 and D-alanylated-LTA (D-Ala-LTA) from *Lp* cell envelope to support *Drosophila* growth. Our results establish that DltE is not a carboxypeptidase modifying *Lp* peptidoglycan but rather a D-Ala esterase acting upon D-Ala-LTA. After characterizing the chemical nature of LTAs and WTAs, we show that only LTAs but not WTAs are D-alanylated in *Lp*<sup>NC8</sup> cell envelopes and we demonstrate that D-Ala-LTAs, in addition to PG, are direct symbiotic cues supporting  
105 intestinal peptidase expression and juvenile growth in *Drosophila*.

## Results

### Structure of the extracellular domain of DltE

110 DltE is annotated as a putative serine type D-Ala-D-Ala carboxypeptidase. However, sequence comparison with canonical members of this protein family revealed low sequence identity (Extended Data Fig. 1). Additionally, while the catalytic S-X-X-K motif (Motif 1) is conserved in DltE, the second (Y-X-S) and third (K/H-T/S-G) motifs that complete the active site are altered with only the catalytic Tyr and the Gly residues being conserved, respectively. This  
115 suggests a modified active site environment with potentially different catalytic and/or substrate binding mechanisms. Supporting this, we showed that the extracellular catalytic domain of DltE

(DltE<sub>extra</sub> 34-397) is not able to bind penicillin although this property is a hallmark of serine type D-alanyl-D-alanine carboxypeptidases that belongs to the PBP (Penicillin binding proteins) protein family (Extended Data Fig. 2).

120 These features prompted us to determine the structure of the extracellular domain of DltE (DltE<sub>extra</sub>) by X-ray crystallography (Supplementary Table 1). The domain consists of two subdomains, a  $\alpha$ - $\beta$  sandwich (residues 76-126 and 246-397) that form a five strand ( $\beta$ 1-  $\beta$ 5) antiparallel  $\beta$ -sheet flanked by 5  $\alpha$ -helices ( $\alpha$ 2,  $\alpha$ 9- $\alpha$ 12) and a  $\alpha$ -helix rich region (residues 127-125 245) folding in 6  $\alpha$ -helices ( $\alpha$ 3- $\alpha$ 8) (Fig. 1a and Extended Data Fig. 1). DltE is structurally homologous to the D-Ala-D-Ala carboxypeptidase R61 (DDCP) from *Streptomyces* (Fig. 1b,c)<sup>19,20</sup> that exhibits the classical  $\beta$ -lactamase fold of PBPs (Fig.1b). The positions of the active site S-X-X-K motif (<sup>128</sup>SIQK<sup>131</sup>), containing the catalytic Ser128 and Lys131 residues, and the catalytic Tyr213 from the second motif are conserved (Fig. 1a,b and Fig. 2). These last two residues are expected to function as a general base during the acylation step and function 130 as a relay mechanism for the transfer of a proton from the incoming substrate to the departing catalytic serine. In contrast, several striking features distinguish DltE from DDCP and more generally from PBPs and DD-carboxypeptidases. The  $\beta$ 3-strand that usually bears the third motif and defines one side of the catalytic cavity is not conserved in terms of length and position<sup>19</sup> (Fig. 1c). Second, DltE contains an extra  $\alpha$ -helix ( $\alpha$ 1) at the N-terminus of the catalytic domain (Fig. 1c) as well as three major structural differences affecting the regions 135 lining the sides of the active site of DDCP and responsible for its cavity-like shape (Fig. 1c,e,g): (i) a 15-amino acids long loop connecting  $\alpha$ 4 and  $\alpha$ 5 in DltE (residues 175-190 named Loop I on Fig. 1c,d and Extended Data Fig. 1) that replaces a longer region of 20 residues that is folded in  $\alpha$ -helices in DDCP; (ii) the mostly unstructured segment ranging from residues 328 to 346 140 in DltE and located between  $\alpha$ 11 and  $\beta$ 3 (Loop II on Fig. 1c,d and Extended Data Fig. 1) is 10 residues longer in DDCP in which it forms an antiparallel  $\beta$ -sheet of 3 small strands that follows the main 5-stranded  $\beta$ -sheet; (iii) the loop between  $\alpha$ 8 and  $\alpha$ 9 (residues 257-283 in DltE) connecting the two subdomains is slightly shorter in DltE and adopts a different position (Fig. 1c). This last difference is of particular interest because this loop was described as the  $\Omega$ -like 145 loop in  $\beta$ -lactamases and PBP proteins<sup>21,22</sup> and shown to play a key role in the maintenance of the active site topology and in the enzymatic activity (Fig. 1e and Extended Data Fig. 1). The global architecture of the active site cavity of DltE is therefore reshaped and different from that of DDCP enzymes, adopting a deeper cleft topology largely opened on both sides of the protein (Fig. 1d-g). Together with its inability to bind penicillin, such structural features strongly

150 suggest that DltE possesses an alternative substrate recognition mode and/or a different substrate specificity than PBPs.

### **DltE is not active on the peptidoglycan stem depsipeptide**

Besides the apo form structure, we obtained two other DltE structures in complex with tartrate  
155 or TCEP (Tris(2-carboxyethyl)phosphine hydrochloride), two compounds arising from the crystallization conditions (Supplementary Table 1 and Fig. 2a,b). Intriguingly, these two molecules are anchored by an interaction network that involves 8 different residues, among which the conserved active site nucleophile Ser128 and the base Tyr213 (Ser 62 and Tyr 159 in DDCP; Fig. 2a,b,e). Importantly, the catalytic Ser128 with the hydroxyl group of its side  
160 chain positioned at only 2.7 Å away from a carboxylic group of TCEP and Tartrate is ideally placed as it would activate a substrate for the enzyme acylation event as described for DDCP<sup>19</sup>. This suggests that the tartrate and TCEP molecule may mimic the nature and position of the natural substrate of DltE in its active site and that the acylation/deacylation step of the catalytic reaction is probably preserved in DltE (Fig. 2b,c). In addition, tartrate or TCEP established a series of interactions with the structural elements specific to DltE (see above) and not found in  
165 DDCP (Fig. 2e). Notably, a Tyr residue (Tyr338 in DltE) interacting with TCEP or tartrate replaces the conserved Arginine (Arg285 in DDCP) in carboxypeptidases. This arginine is key for the recognition of the terminal carboxylate of the peptide substrate and the carboxypeptidase activity<sup>19</sup> (Fig. 2b,d,e). Furthermore, the interactions involving motif 2 and 3 that stabilizes the substrate in DDCP and in particular the penultimate D-Ala residue of the peptide substrate, are  
170 also largely altered (Fig. 2b,d,e). In DltE, the hydrophobic contact with TCEP or tartrate is only maintained with the conserved Tyr213 and Gly348 of motif 2 and motif 3, respectively. Instead, residues specific to DltE (Tyr338, His347, Arg345 and Leu349) stabilize the TCEP or tartrate molecules (Fig. 2a,b). Taken collectively, our structural data suggest that DltE would not be  
175 able to recognize the D-Ala-D-Ala terminal end of a stem peptide as DDCP does and that DltE would not be a DD-carboxypeptidase.

In *L. plantarum* peptidoglycan precursors, a D-Lac residue rather than the more common D-Ala is present in position 5 of the peptide stem with an ester bond between D-Ala<sup>4</sup> and D-Lac<sup>5</sup>  
180 <sup>15</sup>. Tartrate and TCEP molecules having chemical groups that are also found in D-Lac (Extended Data Fig. 3), we hypothesized that the DltE structural features described above could reflect its ability to act as a carboxylesterase trimming the terminal D-Lac in mature peptidoglycan. However, two enzymes, namely DacA1 and DacA2 homologous to the D-Ala-D-Ala-carboxypeptidase DacA (PBP3) of *S. pneumoniae*<sup>23</sup> could be potentially responsible for

the D-Lac hydrolysis. Thus, we generated a *Lp<sup>NC8</sup>* mutant deficient for *dacA1* and *dacA2* and analyzed the peptidoglycan composition. As shown in Extended Data Fig. 4a, we detected the presence of disaccharide-depsipentapeptide (GlcNAc-MurNAc-L-Ala-D-Gln-mDAP-D-Ala-D-Lac). As D-Lac residues are not detected in WT strain<sup>24</sup>, this indicates that DacA1 and/or DacA2 could behave as carboxylesterases removing the terminal D-Lac. To confirm this, we purified the disaccharide-depsipentapeptide from the  $\Delta dacA1\Delta dacA2$  strain and measured the ability of the purified recombinant catalytic domains of DacA1 and DltE to catalyze D-Lac hydrolysis. We observed that DltE was not able to cleave the ester bond between D-Ala<sup>4</sup> and D-Lac<sup>5</sup> from the disaccharide-depsipentapeptide, whereas purified DacA1, efficiently did (Fig. 3a). These results indicate that DltE is not a carboxylesterase active on peptidoglycan stem depsipentapeptide.

195

### **DltE is a D-Ala esterase acting on D-alanylated-LTA**

Since DltE is not active on peptidoglycan and because *dltE* gene is part of the *dlt* operon in *Lp<sup>NC8</sup>*, we hypothesized that DltE could have a D-Ala esterase activity on D-alanylated teichoic acids. To assess whether DltE could act on WTA and/or LTA, we first characterized their structure by NMR in *Lp<sup>NC8</sup>* and determined their alanylation levels. Multidimensional NMR spectroscopy analysis revealed that WTA from *Lp<sup>NC8</sup>* contained two main repetition units composed of Rbo-phosphate chains substituted by two  $\alpha$ -Glc residues either in C-2 and C-4 positions (major unit) or in C-3 and C-4 positions (minor unit) (Extended Data Fig. 4b). Remarkably, no Ala substituents were detected. WTA purified from  $\Delta dltXABCD$  were structurally identical from those purified from *Lp<sup>NC8</sup>*, which supports that the DltXABCD complex is not involved in the D-alanylation of WTA. In contrast to WTA, NMR analysis established that LTA from *Lp<sup>NC8</sup>* is constituted by repetitive units of Gro-phosphate chains that were either unsubstituted (Unit A) or substituted with either Ala (Unit B),  $\alpha$ -Glc (Unit C) or Ala-6- $\alpha$ Glc (Unit D) groups at C-2 position of Gro residues (Fig. 3b). Relative quantification of NMR signals associated with individual units showed that Unit A was the major form with A/B/C/D ratio of 62:19:15:4. NMR analysis of LTA extracted from  $\Delta dltXABCD$  mutant confirmed the absence of Ala residues characterized by the absence of signals GroB-2 and GlcD-6 that typify the presence of Unit B and D in WT LTA, respectively (Fig. 3b). Taken together these results establish that *L. plantarum<sup>NC8</sup>* cell envelope carries LTAs with a distinctive pattern of structure and substitution and that only LTAs are D-alanylated. In addition, these observations confirm that the Dlt machinery is necessary to the D-alanylation of *Lp* LTAs.

215



Given that only LTAs are alanylated in *L. plantarum*<sup>NC8</sup>, we started testing DltE ability to bind LTA through microscale thermophoresis (MST) experiments. As shown in Fig. 3c, DltE<sub>extra</sub> was able to efficiently bind LTA. Then, we examined the activity of DltE on D-Ala-LTA purified from *Lp*<sup>NC8</sup>. To achieve this, we analyzed the relative amounts of Ala esterified to Gro (Gro-Ala) and free Ala released from LTA upon incubation with or without DltE<sub>extra</sub>. Both compounds were detected in the control sample as a result of spontaneous release of D-Ala from LTA, when the test was performed without DltE (Fig. 3d and Extended Data Fig. 5). Upon incubation of LTA with DltE, we observed a clear decrease (56 % decrease) of Gro-Ala and a concomitant increase of free D-Ala. This effect was enhanced (64 % decrease) with a double amount of DltE<sub>extra</sub> in the test. In contrast, no difference with the control sample was observed for LTA incubated with DltE<sup>S128A</sup> catalytic mutant protein or with DacA1 (Fig. 3d). These results establish that DltE possesses a D-Ala esterase activity that cleaves the ester bond between the substituting D-Ala and Gro in LTA chains.

To gain structural insights into this activity, we soaked DltE crystals with LTA extracted from the  $\Delta dltXABCD$  mutant and determined the 3D structure of such enzyme-substrate complexes (Supplementary Table 1). We observe that the cleft harbors an additional, elongated density compatible with the presence of a 2-mer unit of the LTA molecule (Fig. 2c). Half of the electron density is located at the same place as the tartrate and TCEP ligands (Fig. 2) and would correspond to one unit of glycerol phosphate. It is stabilized by the same interaction network described above for tartrate and TCEP that share similar chemical groups, *i.e.* hydroxyl, carboxyl and phosphate with LTA (Fig. 2d, Extended Data Fig. 3). The second half of the electron density extends further on the catalytic cleft of DltE in the vicinity of Glu290 (in helix  $\alpha$ 9) and Tyr351 (between  $\beta$ 3 and  $\beta$ 4), forming thus a negatively charged subsite. The latter is not conserved in DDCP and replaced by a hydrophobic subsite that was proposed to recognize the aliphatic portion of the peptide (Extended Data Fig. 6a,b). These structural features are in agreement with the ability of DltE to bind and hydrolyse D-Ala-LTA and together with the biochemical data, they confirm that DltE is a D-Ala esterase acting on D-Ala-LTA.

245

### **The D-Ala esterase activity of DltE contributes to D-alanylation of the cell envelope and is required to sustain *Drosophila* juvenile growth**

We previously reported that the machinery encoded by the *dlt* operon (including *dltE*) is necessary to support D-Ala esterification in *L. plantarum* cell envelope and sustain *Drosophila* juvenile growth<sup>14</sup>. As previously observed upon mild alkaline hydrolysis, D-Ala was released in appreciable amounts from *Lp*<sup>NC8</sup> cells<sup>14</sup> (Fig. 4a) whereas no D-Ala was released from an

250



isogenic mutant deleted for the entire *dlt* operon<sup>14</sup>. However, we observed a significant reduction (around 70%) of D-Ala esterified to LTAs in  $\Delta dltE$  mutant cells and an even higher reduction (around 93%) for *dltE*<sup>S128A</sup> catalytic mutant cells. These results indicate that the  
255 esterase activity of DltE, in addition to the activities of DltX, A, B, C and D contributes to the D-alanylation machinery of LTAs in bacterial cells.

We next wondered if an active DltE protein is necessary for *L. plantarum* support to *Drosophila* juvenile growth. To this end, we compared juvenile growth (larval size at Day 6 after egg laying) and developmental timing (i.e day of 50% population entry to metamorphosis) of germ-free animals and ex-germ-free animals associated at the end of embryogenesis with either *Lp*<sup>NC8</sup>  
260 or  $\Delta dltE$  and *dltE*<sup>S128A</sup> mutants. Both mutations did not affect the ability of *Lp* to thrive in the fly niche but significantly altered the ability of *Lp* to support larval growth and developmental timing (Fig. 4b-d). These results demonstrate that DltE activity is required to sustain *Drosophila* juvenile growth and together with the structural and biochemical insights on DltE activity point  
265 to the importance of D-Ala-LTAs as symbiotic cues supporting *Drosophila* growth.

### **D-Ala-LTAs are necessary symbiotic cues supporting *Drosophila* intestinal response and juvenile growth**

In order to evaluate the importance of D-Ala-LTA for *Drosophila* juvenile growth, we  
270 undertook a genetic approach by generating *L. plantarum* strains either deprived of LTA through the deletion of *ltaS* encoding for the LTA synthetase ( $\Delta ltaS$ )<sup>25</sup> or WTA through the deletion of *tagO* encoding for the enzyme catalyzing the first step of WTA biosynthesis ( $\Delta tagO$ )<sup>26</sup>. A similar amount of D-Ala esterified to the cell envelope was measured in  $\Delta tagO$  mutant cells compared to WT *Lp*<sup>NC8</sup> cells, whereas a strong reduction of D-Ala (around 72%)  
275 was observed in  $\Delta ltaS$  mutant cells (Extended Data Fig. 7b). The absence of LTA chain synthesis in  $\Delta ltaS$  mutant was confirmed by Western blot with anti-LTA monoclonal antibody (Extended Data Fig. 7a). These results confirm that LTA are D-alanylated but not WTA as determined above by NMR analysis of purified polymers (Fig. 3). Of note, we hypothesize that the residual D-Ala released for  $\Delta ltaS$  cells might be attached to a glycolipid precursor of LTA  
280 as previously observed in *Listeria monocytogenes*<sup>27</sup>.

We then tested the respective TA defective strains for their ability to support *Drosophila* juvenile growth (Fig. 5a). When associated with germ-free animals, *Lp*<sup>NC8</sup> and  $\Delta tagO$  strains support optimal *Drosophila* juvenile growth while  $\Delta dlt_{op}$  or  $\Delta ltaS$  strains largely fail to do so despite colonizing well their host's niche (Fig. 5a; Extended Data Fig. 7c). These data  
285 demonstrate that LTA are important molecules mediating *Lp*'s support to *Drosophila* juvenile

growth. Accordingly, presence of D-Ala esterified to LTA chains (in *Lp*<sup>NC8</sup> and *ΔtagO* strains) correlates well with strains ability to support *Drosophila*'s growth. Indeed, D-Ala-LTA presence is required for *L. plantarum* mediated *Drosophila* juvenile growth promotion phenotype (Fig. 5a; Extended Data Fig. 7a,b). In the absence of D-Ala-LTA (in *Δdlt<sub>op</sub>*) or LTA (in *ΔltaS*), *Drosophila* larvae are smaller and develop slower (Fig.5a). Taken collectively these data reinforce the notion that D-Ala-LTAs from *Lp* play a key role in supporting *Drosophila* juvenile growth.

We had previously established that upon association with *Lp*, enterocytes from ex-germ free *Drosophila* sense and signal the presence of *Lp* cells by at least two independent molecular mechanisms: (i) PGRP-LE-mediated mDAP-PG fragment recognition triggering Imd/Dredd signaling<sup>13</sup> and, (ii) sensing of bacterial cell envelope bearing D-alanylated teichoic acids and signaling by unknown host mechanisms (Fig. 5b)<sup>14</sup>. Both signals were reported to be important for maximal intestinal peptidase expression and optimal support to growth promotion by *Lp* (Fig. 5a,c,d)<sup>14</sup>. To probe the respective contribution of LTA and WTA to this model, we tested the ability of *ΔltaS* and *ΔtagO* strains (respectively deprived of LTA or WTA) to support *Drosophila* growth and intestinal peptidase expression in a *Drosophila* genetic background (*Dredd* mutants flies)<sup>28</sup> that blunts the host response to mDAP-PG fragments<sup>29</sup>, allowing us to focus on the contribution of the D-alanylation signal to *Lp*-mediated growth support and intestinal peptidase induction. As previously observed upon association with the *Δdlt<sub>op</sub>* mutant, *Dredd* mutant larvae associated with *ΔltaS* are compromised in their juvenile growth potential (Fig. 5a) and their ability to stimulate intestinal peptidase expression (*Jon66Cii* and *Jon65Ai*; Fig. 5c-d). However, juvenile growth and intestinal peptidase expression were not markedly affected in *ΔtagO*-associated *Dredd* larvae (Fig. 5a-c,d). Importantly, we observed a cumulative effect of not having D-Ala-LTA (*Δdlt<sub>op</sub>*) or not having LTA at all (*ΔltaS*) and altering host mDAP-PG sensing (compare WT -*yw*- and *Dredd* conditions, Fig. 5a,c-d). These results therefore support the notion that both signals are required for optimal support to larval growth by *Lp* and that in addition to mDAP-PG fragments, D-Ala-LTAs are likely an additional symbiotic cue sensed by *Drosophila* enterocytes.

### 315 **D-Ala-LTAs are direct symbiotic cues supporting *Drosophila* intestinal response and juvenile growth**

Next, we tested the hypothesis that D-Ala-LTAs act as direct signals sensed by *Drosophila* enterocytes. To this end, we purified the major components from the cell envelope of *Lp*<sup>NC8</sup> and *ΔdltXABCD* strains: WTA, LTA and PG, and tested their ability to rescue *Δdlt<sub>op</sub>* and *ΔltaS*

320 mediated larval phenotypes (Fig. 6a-e). First, germ-free,  $\Delta dlt_{op}$  or  $Lp^{NC8}$ -associated animals were treated daily with the purified cell envelope components (WTA, PG and LTA) for 5 days. On day 6, larvae were harvested and their size measured (Fig. 6b-e). Daily supplementation with purified WTA or PG either from  $Lp^{NC8}$  or  $\Delta dltXABCD$  strains did not impact the growth of GF or  $\Delta dlt_{op}$  associated larvae (Fig. 6b,c,d). In contrast, the daily supplementation of purified  
325 LTA isolated from  $Lp^{NC8}$  (D-Ala-LTAs) to larvae associated with the  $\Delta dlt_{op}$  strain shows a growth promoting effect that leads to increased larval size in this condition when compared to the non-supplemented control (Fig. 6d,e). This growth promoting effect was not observed in GF and  $Lp^{NC8}$  associated animals nor when  $\Delta dlt_{op}$  associated larvae were supplemented with non-alanylated-LTAs isolated from  $\Delta dltXABCD$  strain (Fig. 6d,e). We repeated the similar  
330 experiment with  $\Delta ltaS$  associated larvae and again observed an improved larval growth upon supplementation with LTA purified from  $Lp^{NC8}$  (D-Ala-LTAs) but not from LTAs purified from  $\Delta dltXABCD$  strain (ie non-alanylated-LTAs) (Fig. 6e). These results therefore establish that D-Ala-LTAs are necessary and sufficient to restore *Drosophila* juvenile growth. Finally, we repeated purified LTA supplementations on *Dredd* larvae associated with the  $\Delta ltaS$   
335 strain for 5 days and dissected the midguts of size-matched larvae to analyze intestinal peptidase (*Jon66cii* and *Jon65Ai*) expression by RT-qPCR independently of any mDAP-PG sensing/Imd signaling input (Fig. 6a,f,g). We observed that supplementation with D-Ala-LTAs was sufficient to recapitulate the effect of  $Lp^{NC8}$  strain on intestinal peptidase expression even in the absence of any mDAP-PG signal (Fig. 5b and Fig. 6f,g). Taken collectively, our results  
340 demonstrate that in addition to and independently of mDAP-PG signaling, D-Ala-LTAs are important direct symbiotic cues supporting intestinal peptidase expression and *Drosophila* juvenile growth.

## 345 Discussion

The results obtained in this study pinpoint the bacterial machinery and molecular determinant of the bacterial cell envelop involved in the beneficial relationship between *Drosophila* and selected strains of its commensal partner *L. plantarum* which results in optimized host growth.  
350 Previously, we identified through forward genetic screening the *pbpX2-dltXABCD* operon encoding a bacterial machinery essential to  $Lp^{NC8}$  mediated support to *Drosophila* larval growth. Here, using complementary structural, biochemical and genetic approaches, we reveal that the protein encoded by the first gene of this operon (now renamed DltE) is not a *bona fide*

355 PBP as it does not bind Penicillin nor modifies *Lp* PG. Instead, we establish that DltE is a D-  
alanine esterase acting upon LTA. While studying its physiological function, we discovered  
that DltE contributes together with the other proteins encoded by the *dlt* operon (the DltX-A-  
B-C-D machinery) to the alanylation of LTA on its glycerol residues. The study of DltE's  
360 substrates gave insights on the structure and composition of *Lp*<sup>NC8</sup>'s TAs, which revealed that  
only LTA and not WTA are alanylated in this strain. Finally, prompted by this strain specific  
feature and the importance of the *dltEXABCD* operon for *Lp*<sup>NC8</sup>-mediated support to *Drosophila*  
growth, we identified that LTAs alanylated by the DltE/X/A/B/C/D complex (but not WTA -  
which are not alanylated - nor non-alanylated LTA) act as direct symbiotic clues supporting  
*Drosophila* intestinal function and juvenile growth.

### 365 **DltE and the Dlt machinery**

Regardless of the initial DltE *in silico* annotation as a PBP (PbpX2), our structural data revealed  
that the global architecture of its active site cavity is reshaped and different from that of  
canonical PBP enzymes suggesting an alternative substrate recognition mode and/or a different  
substrate specificity. Hence, we show that D-Ala LTA and not peptidoglycan is the substrate  
370 of DltE. Given its atomic structure and D-Ala esterase activity, DltE may rather relate to  
*Staphylococcus aureus* FmtA, a D-amino esterase acting on teichoic acids<sup>30</sup>. FmtA is however  
different from DltE given that it shows residual PBP activity, is able to interact with  $\beta$ -lactams  
and is encoded apart from the *dltABCD* operon in *S. aureus* genome. So far, the hypothesis  
advanced for FmtA biological function concerns the removal of D-Ala from LTAs to make it  
375 available to transfer onto WTAs or removal of D-Ala from WTA to reset cell surface charge  
under particular conditions<sup>30</sup>. Considering that WTA are not alanylated in *Lp*<sup>NC8</sup>, these  
observations suggest that DltE possesses a distinct function than FmtA. Our work thus paves  
the way to the characterization of the mechanistical framework in which the interplay between  
the Dlt machinery and DltE are required for the D-alanylation of LTAs.

380

### **Strain specificity in *L. plantarum* teichoic acids composition and modifications**

We analyzed *Lp*<sup>NC8</sup> TAs composition through multidimensional NMR spectroscopy and  
determined their alanylation levels. *Lp*<sup>NC8</sup> LTAs are, as expected from this strain's genomic  
information and previous gram-positive bacteria LTA characterization<sup>31,32</sup>, constituted by poly-  
385 Glycerol-Phosphate (poly-Gro-P) chains substituted, among others, with Ala. In contrast, but  
in agreement with the genetic information from *Lp*<sup>NC8</sup> genome, this strain only produces poly-

Ribitol-Phosphate (poly-Rbo-P) WTAs given the lack of the *tag* genes encoding the machinery responsible for the synthesis of poly(Gro-P) chains in its genome<sup>33</sup>. This ability to produce poly(Gro-P) chain is a strain specific feature as the *tag* gene cluster is only found in 22 out of 390 54 *L. plantarum* strains recently studied at the genomic level<sup>34</sup>. However, in the case of the *Lp*<sup>WCF51</sup> strain, despite its genome carrying the genetic information to synthesize both types of WTA (poly(Gro-P) and poly(Rbo-P)), only poly(Gro-P) WTAs were detected at steady state<sup>33</sup>. Surprisingly, no Ala substituents were detected in *Lp*<sup>NC8</sup> WTAs. This is an original feature as in other *L. plantarum* strains such as *Lp*<sup>WCF51</sup>, WTA appears to be D-alanylated<sup>33</sup>. Yet, these 395 WTAs are composed of poly(GroP) chains so it would be interesting to investigate the levels of D-alanylation in other *Lp* strains harboring only poly(Rbo-P) WTAs. Taken together these observations call for future systematic analysis of TA composition and modification among *L. plantarum* strains and question about the potential correlation between WTA composition and/or TA D-alanylation patterns and the ability of the strain to benefit *Drosophila* growth.

#### 400 ***Drosophila* response to commensals' cell envelop determinants**

We have previously established that PG fragments<sup>13</sup> and D-Ala esterification to the cell envelope<sup>14</sup> trigger intestinal peptidase expression and support *Drosophila* juvenile growth. Here, we report that in addition to PG fragments, D-Ala-LTA from *L. plantarum*<sup>NC8</sup> cell envelop represent a symbiotic cue necessary and sufficient for the ability of *Lp*<sup>NC8</sup> to promote *Drosophila* 405 growth and upregulation of intestinal digestive peptidases in enterocytes. Given that *L. plantarum* is a gut luminal microbe and that the *Drosophila* midgut is lined with both thick chitinous matrix and thin mucus layer, yet permeable to large macromolecules and small nutrient particles<sup>35</sup>, how exactly these macromolecules associated to the bacterial cell membrane reach the enterocytes remains elusive. Similarly to PG fragments, which are shaded 410 in the extracellular media during bacterial cell division, LTA chains may also be shaded after cleavage of the lipid anchor<sup>36</sup>. In addition, our recent findings report *Lp*<sup>NC8</sup>'s ability to release microvesicles of multi-nanometers ranges<sup>37</sup>. This observation coupled to previous reports showing that other *Lactobacillus* strains form microvesicles containing LTAs which are endocytosed by mammalian enterocytes<sup>38</sup>, it is tempting to speculate that *Lp*<sup>NC8</sup> D-Ala-LTAs 415 are released via bacterial microvesicles cargo. The *Drosophila* host would capitalize on these features by endocytosing cleaved LTA or such cargo and sense these symbiotic cues through pattern recognition receptors expressed in enterocytes.

PG fragments are sensed intracellularly in the *Drosophila* midgut by PGRP-LE which signals the Imd pathway to stimulate intestinal peptidase expression. How D-Ala-LTAs are sensed and

420 signal in enterocytes remain elusive but our results support the notion that another signaling  
cascade beyond the one engaged by PGRP-LE is leading to D-Ala-LTA mediated intestinal  
peptidase induction. Taken together, it seems that *Drosophila* ensures an optimal intestinal  
response to symbiotic cues by using additive rather than interdependent signals converging  
locally to intestinal peptidase expression and macroscopically to enhanced juvenile growth.

425 Given the strong analogies of the impact of *L. plantarum* strains on *Drosophila* and Mouse  
growth<sup>39</sup> and previous work focusing on LTA in host-gram positive bacteria interactions<sup>38,40</sup>,  
an exciting perspective will be to test the contribution of D-ala-LTA to *L. plantarum* mediated  
host growth promotion in other symbiotic models including mammals.

430



## 435 ONLINE METHODS

### **Drosophila diets, stocks and breeding**

*Drosophila* stocks were cultured as described in Erkosar et al., 2015<sup>13</sup>. Briefly, flies were kept at 25°C with 12/12 hours dark/light cycles on a yeast/cornmeal medium containing 50 g/L of inactivated yeast. The low yeast diet was obtained by reducing the amount of inactivated yeast to 7 g/L. Germ-free stocks were established as described in Erkosar et al., 2015<sup>13</sup>. Axenicity was routinely tested by plating serial dilutions of animal lysates on nutrient agar plates. *Drosophila y,w* flies were used as the reference strain in this work. The following *Drosophila* line was also used: *y,w,Dredd*<sup>F64 28</sup>.

445

### **Bacterial strains and growth conditions**

Strains used in this study are listed in Supplementary Table 3. *E. coli* strains were grown at 37°C in LB medium with agitation. *L. plantarum* strains were grown in static conditions in MRS media at 37°C, unless differently stated. Erythromycin antibiotic was used at 5 µg/mL for *L. plantarum* and 150 µg/mL for *E. coli* in the context of the deletion strains construction.

450

### **Construction of deletion strains in *L. plantarum*<sup>NC8</sup>**

Independent markerless deletions on *ltaS*, *tagO*, *dacA1* and *dacA2* genes of *L. plantarum*<sup>NC8</sup> genome were constructed through homology-based recombination with double-crossing over: as described by Matos et al., 2017<sup>14</sup> (Supplementary Table 3). Briefly, the 5'- and 3'-terminal regions of each region were PCR-amplified with Q5 High-Fidelity 2X Master Mix (NEB) from *L. plantarum*<sup>NC8</sup> chromosomal DNA. Primers contained overlapping regions with pG+host<sup>941</sup> to allow for Gibson Assembly. PCR amplifications were made using the following primers: XL01/XL02 and XL03/XL04 (*ltaS*), XL05/XL06 and XL07/XL08 (*tagO*), XL09/XL10 and XL11/XL12 (*dacA1*), XL13/XL14 and XL15/XL16 (*dacA2*) listed in Supplementary Table 3. The resulting plasmids obtained by Gibson Assembly (NEB) were transformed into *L. plantarum*<sup>NC8</sup> electrocompetent cells and selected at the permissive temperature (28°C) on MRS plates supplemented with 5 µg/mL of erythromycin. Overnight cultures grown under the same conditions were diluted and shifted to the non-permissive temperature (41°C) in the presence of 5 µg/mL of erythromycin to select single crossover integrants. Plasmid excision by a second recombination event was promoted by growing integrants at the permissive temperature without erythromycin. Deletions were confirmed by PCR followed by sequencing. The strain deleted for *dacA1* and *dacA2* was obtained by the sequential deletion of *dacA1* followed by *dacA2*.

465



470

### Knock-in of *DltE* catalytic dead versions in *L. plantarum*<sup>NC8</sup>

*L. plantarum*<sup>NC8</sup> strain carrying a modified version of the *dltE* gene (*dltE*<sup>S128A</sup>) was built by knocking-in the modified sequence on  $\Delta dltE$  strain<sup>14</sup>. *dltE* modified sequence harboring the mutation S128A was obtained by PCR with modified primers (X19). The 5'- and 3'-terminal regions of *dltE* region together with the entire *dltE* gene were PCR-amplified with Q5 High-Fidelity 2X Master Mix (NEB) from *L. plantarum*<sup>NC8</sup> chromosomal DNA using primers XL17/XL18 and XL19/XL20 (Supplementary Table 4). The 2 fragments were assembled with pG+host9<sup>41</sup>. The resulting plasmid was transformed into  $\Delta dltE$  electrocompetent cells and selected at the permissive temperature (28°C) on MRS plates supplemented with 5 µg/mL of erythromycin. Overnight cultures grown under the same conditions were diluted and shifted to the non-permissive temperature (41°C) in the presence of 5 µg/mL of erythromycin to select single crossover integrants. Plasmid excision by a second recombination event was promoted by growing integrants at the permissive temperature without erythromycin. *dltE*<sup>S128A</sup> knock-in was confirmed by PCR followed by sequencing.

485

### Larval size measurements

Axenic adults were put overnight in breeding cages to lay eggs on sterile low yeast diet. Fresh axenic embryos were collected the next morning and seeded by pools of 40 in tubes containing fly food.  $1 \times 10^8$  CFUs or PBS were then inoculated homogeneously on the substrate and the eggs. Fly tubes are incubated at 25°C until larvae collection. *Drosophila* larvae, 6 days after inoculation, were randomly collected and processed as described by Erkosar et al, 2015<sup>13</sup>. Individual larval longitudinal length was quantified using ImageJ software<sup>42</sup>. For the cell envelope components supplementation experiments, 1 µg of purified LTA, WTA and PG (extracted from strains *Lp*<sup>NC8</sup> and  $\Delta dltXABCD$ ) resuspended in PBS were added, independently, to the fly food every day until day 5 (see Figure 6a). For comparison of components extracted from each of the two strains, the final LTA, WTA and PG suspensions were adjusted to the same amount of Gro, Rbo and Mur respectively. At day 6, larvae were harvested and larval longitudinal length was quantified using ImageJ software<sup>42</sup>.

495

### 500 Developmental timing determination

Axenic adults were placed in breeding cages overnight to lay eggs on sterile poor-yeast diet. Fresh axenic embryos were collected the next morning and seeded by pools of 40 in tubes containing fly food. A total of  $1 \times 10^8$  CFUs of each strain or PBS was then inoculated

homogeneously on the substrate and the eggs and incubated at 25 °C. The emergence of pupae  
505 was scored every day until all pupae had emerged. D50 (day when 50% of the pupae emerged)  
was determined using D50App<sup>14</sup>.

### **Bacterial loads analysis**

To access bacterial CFU in the fly nutritional matrix, microtubes containing food and larvae  
510 were inoculated with  $1 \times 10^7$  CFUs of each strain, independently. Tubes were incubated at 25°C  
until being processed. For bacterial load quantification, 0.75-1 mm glass microbeads and 500  
 $\mu$ L PBS were added directly into the microtubes. Samples were homogenized with the Precellys  
24 tissue homogenizer (Bertin Technologies). Lysates dilutions (in PBS) were plated on MRS  
515 agar using the Easyspiral automatic plater (Intersciences). MRS agar plates were then incubated  
for 24 h at 37°C. Bacterial concentration was deduced from CFU counts on MRS agar plates  
using the automatic colony counter Scan1200 (Intersciences) and its counting software. For  
larval loads, *y,w* axenic eggs were inoculated with  $1 \times 10^8$  CFUs of each strain and incubated  
at 25 °C until collection. Size-matched larvae were harvested from the nutritive substrate and  
520 surface-sterilized with a 30 s bath in 70% ethanol under agitation and rinsed in sterile water.  
Pools of five larvae were deposited in 1.5 ml microtubes containing 0.75–1 mm glass  
microbeads and 500  $\mu$ L of PBS.

### **RNA extraction and RT-qPCR analysis**

Axenic *y,w* and *y,w,Dredd* embryos were inoculated with  $1 \times 10^8$  CFU of *Lp<sup>NC8</sup>*,  *$\Delta dlt_{op}$*  and  *$\Delta ltaS$*   
525 strains independently or kept axenic. Larvae were size matched for the four conditions and  
harvested at mid-L3 larval stage. Alternatively, larvae were inoculated with each one of the  
strains mentioned above and supplemented daily with cell envelop purified components (LTA,  
WTA, PGN) from *Lp<sup>NC8</sup>* or  *$\Delta dlt_{op}$*  cells. RNA extraction of five replicates of six dissected guts  
for each condition was performed as described by Matos et al 2017<sup>14</sup>. RT-qPCR was performed  
530 using gene-specific primer sets (Supplementary Table 4) as described by Matos et al 2017<sup>14</sup>.  
Results are presented as the value of  $\Delta C_t^{\text{gene}}/\Delta C_t^{\text{rp49}}$ .

### **Statistical analysis**

Data representation and analysis was performed using Graphpad PRISM 8 software  
535 ([www.graphpad.com](http://www.graphpad.com)). A total of 3 to 5 biological replicates were used for all experiments  
performed in this study in order to ensure representativity and statistical significance. All

samples were included in the analysis. Experiments were done without blinding. Two-sided Mann Whitney's test was applied to perform pairwise statistical analyses between conditions

#### 540 ***E. coli* plasmid construction**

DNA fragments were amplified by polymerase chain reaction using *L. plantarum* cDNA as a template and oligonucleotides listed in Supplementary Table 5. The DNA encoding the extracellular domain of wild-type DltE (DltE<sub>extra</sub>) and the catalytic mutant DltE<sub>extra</sub>-S128A were cloned into the NcoI and XhoI sites of the pET-28a(+) vector that expresses proteins fused to a  
545 C-terminal hexahistidine (His)<sub>6</sub> tag (Supplementary Table 6).

#### **Protein production and purification**

DltE<sub>extra</sub> and DltE<sub>extra</sub>-S128A were expressed in *E. coli* BL21 (DE3)-RIPL cells. Cells were grown in LB media at 37°C and induced with 0.5mM isopropyl b-D-1-thiogalactopyranoside (IPTG) overnight at 18°C. The cells were then harvested by centrifugation and resuspended in  
550 lysis buffer (50mM Tris, pH 7.5, 500mM NaCl, 10% (v/v) Glycerol, 1mM Dithiothreitol (DTT) 0.01 mg/ml Lysozyme, 0.006 mg/ml Dnase/RNase, protease inhibitor). The resuspended cells were disrupted by sonication and centrifuged at 14000 g for 45 min. Proteins were purified by a first step of Ni-NTA affinity chromatography with the elution buffer (50mM Tris pH 7.5,  
555 300mM NaCl, 1mM DTT, 250mM Imidazole). The eluted fractions were then concentrated and buffer-exchange was performed in a centrifugal filter unit with gel filtration buffer (50mM Tris pH7.5, 100mM NaCl and 1mM DTT). The proteins were finally applied to a Superdex 200 16/600 GL size exclusion column (GE Healthcare) and eluted with gel filtration buffer.

#### 560 **Crystallization, data collection and structure determination**

Crystallization conditions were screened at 293 K using the sitting-drop vapor-diffusion method and commercial crystallization kits Crystal Screen 1 and 2, PEG/Ion 1 and 2 (Hampton Research). Further optimization screenings around conditions of initial hits were also performed. The crystallization drops (0.2μL protein solution and 0.2μL reservoir solution) were  
565 set up using a Mosquito crystallization robot and equilibrated against 70 μL reservoir solution. DltE<sub>extra</sub> and DltE<sub>extra</sub>-S128A were concentrated to around 10 mg/ml prior to crystallization. Diffraction quality crystals grew after around 1 week in three different conditions: (1) 26% PEG MME 5K, 0.1M Tris pH8.5, 0.15M LiSO<sub>4</sub> and 30% ethylene glycol (named hereafter apo

condition); (2) 26% PEG 3350, 0.1M ammonium tartrate (tartrate condition); (3) 20% PEG  
570 3350, 0.2M ammonium tartrate and 0.1M TCEP HCl (TCEP condition). Crystals obtained in  
the conditions 2 were also soaked for one day in the crystallization condition containing 10 mM  
of LTA (prepared as described below) (LTA condition).

Crystals grown in conditions 2 and 3 were cryoprotected prior to data collection by rapid  
soaking in mother liquor containing 20% (v/v) glycerol and for the TA-soaked crystals 10 mM  
575 of TA. Crystals were flash-cooled in liquid nitrogen and diffraction data were collected at  
cryogenic temperature (100 K) on beamlines ID23-2 and ID30B at the European Synchrotron  
Radiation Facility (ESRF, Grenoble, France) and on beamlines PROXIMA-1 and PROXIMA-  
2 at SOLEIL synchrotron (Gif sur Yvette, France).

Data were processed using the XDS package<sup>43</sup>. The space groups, asymmetric unit contents and  
580 diffraction resolutions obtained for each of the crystallization conditions are presented in  
Supplementary Table 1. The structures were solved by molecular replacement using Phaser  
implemented in PHENIX<sup>44</sup>. The PDB entry 3WWX<sup>45</sup> was used as starting model to solve the  
DltE<sub>extra</sub>-apo structure derived from the crystals obtained in the crystallization conditions 1. The  
other three structures (named DltE<sub>extra</sub>-tartrate; DltE<sub>extra</sub>-TCEP and DltE<sub>extra</sub>-LTA) were solved  
585 using the DltE<sub>extra</sub>-apo as a starting model. Structures were refined using iterative rounds of  
COOT<sup>46</sup> and PHENIX<sup>44</sup> or Refmac5 of CCP4<sup>47</sup>. The quality of the final structure was assessed  
with MOLPROBITY<sup>48</sup> before deposition at the Protein Data Bank under the accession codes  
8AGR(DltE<sub>extra</sub>-apo), 8AIK(DltE<sub>extra</sub>-tartrate), 8AJI(DltE<sub>extra</sub>-TCEP) and 8AKH (DltE<sub>extra</sub>-  
LTA). Sequence alignments and structure images were generated with PyMOL (Schrödinger,  
590 LLC), UCSF ChimeraX<sup>49</sup>, ESPript and ENDscript<sup>50</sup>. Data collection and final refinement  
statistics are presented in Supplementary Table 1.

### Microscale thermophoresis assays

Protein-ligand interactions were analyzed by microscale thermophoresis (MST)<sup>51</sup>. Buffer of  
purified and concentrated protein samples was exchanged on a desalting PD-10 column to  
595 labeling buffer containing Hepes 25mM pH7.5, NaCl 300mM, Tween 20 0.05% (w/v). Proteins  
were then labeled with NHS red fluorescent dye according to the instructions of the RED-NHS  
Monolith NT Protein Labeling kit (NanoTemper Technologies GmbH, Munchen, Germany).  
After a short incubation of target-partner complex, the samples were loaded into MST premium  
glass capillaries and eight measurements were performed (four with target alone and four with  
600 target-partner complex) at 22°C. The assays were repeated three times for each binding check

experiment. Data analyses were performed using Nanotemper Analysis software provided by the manufacturer.

### **Release of D-Ala from whole bacterial cells and quantification by UHPLC**

605 D-Ala esterified to teichoic acids was detected and quantified as described by Kovács et al., 2006<sup>52</sup>. Briefly, D-Ala was released from lyophilized whole heat-inactivated bacteria by mild alkaline hydrolysis with 0.1 N NaOH for 1h at 37°C. After neutralization, the extract was incubated with Marfey's reagent (1-fluoro-2,4-dinitrophenyl-5-L-alanine amide; Sigma). This reagent reacts with the optical isomers of amino acids to form diastereomeric *N*-aryl derivatives,  
610 which can be separated by HPLC. Separation of the amino acid derivatives was performed on a C<sub>18</sub> reversed-phase column (Zorbax Eclipse Plus C18 RRHD 2.1x50mm 1.8µm Agilent) with an Agilent UHPLC 1290 system with a linear elution gradient of acetonitrile in 20 mM sodium acetate buffer pH 5.0. The eluted compounds were detected by UV absorbance at 340 nm. Quantification was achieved by comparison with D-alanine standards in the range of 50 to 2000  
615 pmol. Mean values were obtained from three independent cultures with two injections for each.

### **Detection of LTA by Western blot**

LTA detection was done as previously described<sup>27</sup> with some modifications. Bacterial cells from a 2-ml overnight culture in MRS were added to lysing matrix tubes containing 0.1 mm  
620 silica beads (Lysing Matrix B, MP Biomedicals) and were broken using an MP Biomedicals FastPrep 24 Homogeniser (4.5 m/s intensity for 30 s), with samples being kept on ice. After centrifugation of the suspension at 200 g for 1 min to remove glass beads, cell envelopes and cell debris were recovered by centrifugation at 20.000 g for 15 min. The pellet was resuspended in sample buffer containing 2% SDS. The sample buffer volume was normalized on the culture  
625 OD<sub>600nm</sub>. Samples were heated at 95°C for 20 min and centrifuged at 20.000g for 5 min. Supernatants were loaded on a 15% SDS-polyacrylamide electrophoresis (SDS-PAGE) gel. LTA were detected by Western blotting after transfer onto a PVDF membrane (Immobilon-P transfer membrane, Millipore) by incubation with an anti-LTA mouse monoclonal antibody specific for poly-glycerolphosphate chains (clone 55, Origene, AM26274LE-N) at 1/1000  
630 dilution, followed by anti-mouse antibody coupled to horseradish peroxidase (ThermoFisher Scientific) at 1/2000. Western blot was revealed by chemiluminescence detection using Pierce ECL Western blotting substrate (ThermoFisher Scientific) and a ChemiDoc imaging system (Biorad).

### 635 **Preparation of *L. plantarum* cell walls**

*L. plantarum* strains (500 ml) were grown overnight in MRS medium. Cell walls were prepared as described previously<sup>14</sup>, with some modifications. pH of buffer solutions was kept  $\leq 6.0$  in the different steps to avoid potential D-Ala hydrolysis from teichoic acids. Briefly, bacteria inactivated by heat treatment were boiled in 5% SDS in 50 mM MES buffer pH 5.5 for 25 min. 640 After centrifugation for 10 min at 20.000 g, the pellets were resuspended in 4% SDS in 50mM MES buffer pH 5.5 and boiled again for 15 min. The pellet was washed 6 times with 10 mM MES pH 5.5 preheated at 60°C. An additional step was added consisting in shearing sacculi with glass beads. Pellets were resuspended in 1 ml of 10 mM MES pH 5.5 and the suspension was added to lysing matrix tubes containing 0.1 mm silica beads (MP Biomedicals). The cells 645 were broken using an MP Biomedicals FastPrep 24 Homogeniser (4.5 m/s intensity for 30 s). After centrifugation of the suspension at 200 g for 1 min to remove glass beads, insoluble material containing cell walls was recovered by centrifugation 20.000 g for 15 min. The pellet was resuspended in 50 mM MES pH 6.0, further treated with pronase, trypsin, DNase, RNase and lipase, and finally boiled in 4% SDS in 10 mM MES pH 5.5 for 15 min. The final pellet 650 was washed four times with 10 mM MES pH 5.5 and twice with MilliQ H<sub>2</sub>O to remove SDS traces. The purified cell walls (containing PG, WTA and polysaccharides) was lyophilized and further used for WTA and PG purification.

### **Peptidoglycan purification**

Purified cell walls were treated with hydrofluoric acid (48%) for 19h at 0°C to remove WTA 655 and polysaccharides. The remaining insoluble purified PG was washed twice times with 250 mM Tris-HCl pH 8.0 and four times with MilliQ H<sub>2</sub>O and lyophilized.

### **WTA purification**

WTA were extracted from purified cell walls with TCA as described previously<sup>53</sup> with some 660 modifications. Briefly, lyophilized cell walls (50 mg; prepared as described above, keeping pH  $< 6.0$  to avoid D-Ala hydrolysis from WTA) were incubated with 1 ml of 10% TCA at 4°C for 48h under rotation. The suspension was then centrifuged at 20.000 g for 20 min at 4°C and the supernatant was recovered. WTAs were precipitated by addition of 5V of ethanol and incubation overnight at -20°C. The pellet was purified by resuspension in TCA 10% and 665 precipitation with ethanol. The final pellet was washed twice with cold ethanol and the pellet was resuspended in MilliQ H<sub>2</sub>O and lyophilized. WTAs were resuspended in 100 mM ammonium acetate buffer pH 4.8 (buffer A) and purified by anion exchange chromatography



on a 1-ml HiTrap Q HP column (Cytiva) equilibrated with buffer A. WTAs were eluted with a gradient from 0 to 100 % buffer B (Buffer A containing 1 M NaCl) in 20 min. Fractions were collected and the presence of WTA was assessed in microplates with thymol-H<sub>2</sub>SO<sub>4</sub> reagent<sup>54</sup>, allowing detection of hexoses substituents of WTAs. The WTA-containing fractions were pooled and dialyzed against 10 mM ammonium acetate pH 4.8 with Float-a-Lyzer G2 dialysis devices (cut-off 500-1000 Da) (Spectra/Por) and lyophilized.

#### 675 **LTA purification**

*L. plantarum* strains (5 L) were grown overnight in MRS. Bacteria were harvested at 4.500 g for 10 min. The pellet was resuspended in 5 ml of 20 mM ammonium acetate buffer pH 4.6 (around 20 OD/ml). Bacteria were broken with a Constant Systems Ltd Basic Z Cell Disrupter (CellD) at 2000 bars. Non-broken cells were discarded by centrifugation at 3.000 g for 15 min. LTA was obtained by butanol extraction allowing to keep D-Ala esterified on LTAs as described previously<sup>25,55</sup>. The supernatant was recovered and butanol-1 (1:1 V/V) was added in a glass container. The mixture was stirred for 30 min at room temperature. Insoluble material was discarded after centrifugation at 13.000 g for 20 min in PPCO tubes (Nalgene). The liquid phase was recovered and centrifuged again; the aqueous phase (lower one) containing LTA was recovered. The sample was treated with DNase II (Sigma D8764) at 50 µg/ml for 2h at 37°C to degrade contaminating DNA and lyophilized. LTA was further purified by hydrophobic interaction chromatography (HIC) with a Hi-prep Octyl FF 16/10 column with an AKTA chromatography system. LTA was dissolved in Buffer A (10 mM ammonium acetate pH 4.7 containing 15% propanol-1). Elution was performed with a gradient of buffer B (10 mM ammonium acetate pH 4.7 containing 60% propanol-1) from 0 to 100% in 1h. Fractions were collected and the presence of LTA was tested by dot-blot. Aliquots were spotted on a PVDF membrane (Immobilon-P transfer membrane, Millipore) and incubated with anti-LTA monoclonal antibody (Origene, AM26274LE-N) at 1/1000 dilution, followed by anti-mouse antibody coupled to horseradish peroxidase (Thermofisher) at 1/2000. Dot-blot was revealed by chemiluminescence detection using Pierce ECL Western blotting substrate (Thermo scientific) and detection with a Chemidoc system (Biorad). Fractions containing LTA were pooled, dialyzed against 10 mM ammonium acetate pH 4.6 with Float-a-Lyzer G2 dialysis devices (cut-off 500-1000 Da) (Spectra/Por (500-1000 Da cut-off), and lyophilized.

#### 700 **PG, WTA and LTA composition analysis and quantification**



PG was quantified by analysis of muramic acid (Mur) content after acid hydrolysis as described previously<sup>14</sup>. PG (400 µg) was hydrolyzed by 6N HCl for 16 h at 100°C under vacuum. Mur was quantified by high performance anion exchange chromatography coupled with pulse amperometric detection (HPAEC-PAD) with an ICS5000 system (Thermo Scientific) and a  
705 Dionex CarboPac PA-1 anion exchange column (4 x 250 mm) (Thermo Scientific) with a guard column. Quantification was made with a standard curve of pure Mur (Sigma-Aldrich) (50 to 1000 pmol).

WTA composition was obtained after hydrolysis with hydrofluoric acid 48% at 0°C for 48h. After HF evaporation, samples were further treated with 4M trifluoroacetic acid (TFA) for 3h  
710 at 110°C. Composition was determined by high performance anion exchange chromatography coupled with pulse-amperometric detection (HPAEC-PAD) (ICS5000 system, ThermoFisher Scientific) with a CarboPac PA20 column (Dionex). Composition and amount were determined by comparison with standard amounts of alditols (glycerol, ribitol) and monosaccharides glucosamine, galactosamine, glucose, galactose, rhamnose, ribose).

LTA composition was obtained after hydrolysis by hydrofluoric acid 48% at 0°C for 48h. After HF evaporation, samples were treated with 4M trifluoroacetic acid (TFA) for 3h at 110°C. Composition was determined by HPLC analysis with an Aminex HPX-87C column (Biorad) with a Waters 2414 refractive index (RI) detector using alditols (glycerol, ribitol), monosaccharides and phosphate standards. Quantification was performed by comparison with  
720 standard amounts of the same compounds. D-Ala esterified to LTA was detected after alkaline hydrolysis using Marfey's reagent derivatization, as described above for whole cells.

For supplementation experiments in fly tests, 1 µg of each purified component (PG, WTA and LTA) was used. For comparison of components extracted from *Lp<sup>NC8</sup>* and  $\Delta dltXABCD$ , the final PG, WTA and LTA suspensions were adjusted to the same amount of Mur, Rbo and Gro  
725 respectively.

### NMR analysis

LTA was purified after butanol extraction allowing to keep D-Ala esterified on LTAs as described above<sup>55</sup>. WTA was purified after TCA extraction from cell walls as described above.  
730 pH was kept below 6.0 at all purification steps of both polymers to avoid hydrolysis of the ester bond between D-Ala and the teichoic acid backbone chains. Samples were solubilized in highly enriched deuterated water (99.96% deuterium; EurisoTop, St-Aubin, France) and lyophilized. This process was repeated twice. Data were recorded on a 9.4-T spectrometer and a 18.8-T

spectrometer were  $^1\text{H}$  resonated at 400.33 and 800.12 MHz, and  $^{13}\text{C}$  resonated at 100.2 and  
735 200.3 MHz, respectively. All samples were inserted in 3-mm tubes with matching amounts of  
 $\text{D}_2\text{O}$ . Acetone was added as an internal standard, starting from a solution of 2.5  $\mu\text{l}$  of acetone–  
10 ml of  $\text{D}_2\text{O}$ . All pulse sequences were taken from the Bruker library of pulse programs and  
then optimized for each sample. Spectral widths were 12 and 200 ppm for the proton and carbon  
observations, respectively. TOCSY was performed with various mixing times of 40 to 120 ms.  
740 Edited  $^1\text{H}$ - $^{13}\text{C}$  HSQC spectra were recorded with 1,536 data points for detection and 256 data  
points for indirect direction.

### **Test of carboxyesterase activity on purified muropeptide**

Disaccharide-depsipeptide (GlcNAc-MurNAc-L-Ala-D-Gln-mDAP-L-Ala-L-Lac) was  
745 purified from PG of *dacAldacA2* double mutant of *L. plantarum*<sup>NC8</sup>. PG was digested with  
mutanolysin (Sigma Aldrich) and the resulting soluble muropeptides were reduced by  $\text{NaBH}_4$   
as described previously<sup>24</sup>. The reduced muropeptides were separated by reverse phase ultra-  
high-pressure liquid chromatography (RP-UHPLC) with a 1290 chromatography system  
750 (Agilent Technologies) and a Zorbax RRHD Eclipse Plus C18 column (100 by 2.1 mm; particle  
size, 1.8  $\mu\text{m}$ ; Agilent Technologies) at 50°C using ammonium phosphate buffer and methanol  
linear gradient. The eluted muropeptides were detected by UV absorbance at 202 nm. The peak  
corresponding to the disaccharide-depsipeptide was collected. Purified muropeptide was  
then incubated with 10  $\mu\text{g}$  of purified DltE<sub>extra</sub> or DacA1 in 50 mM Tris-HCl, 100 mM NaCl  
buffer overnight at 37°C. The reaction mixtures were analyzed by RP-UHPLC as described  
755 above and by LC-MS with an UHPLC instrument (Vanquish Flex, Thermo Scientific)  
connected to a Q Exactive Focus mass spectrometer (Thermo Scientific). Mass spectra were  
collected over the range  $m/z = 380$ -1400. Data were processed using Xcalibur QualBrowser  
v2.0 (Thermo Scientific).

### **760 Test of D-Ala esterase activity on LTA**

Purified DltE<sub>extra</sub> (100 and 200  $\mu\text{g}$ ), DltE<sup>S128A</sup><sub>extra</sub> (100  $\mu\text{g}$ ) or DacA1 (100  $\mu\text{g}$ ) were incubated  
overnight at 37°C with 200  $\mu\text{g}$  D-Ala-LTA purified from *L. plantarum*<sup>NC8</sup> in a final volume of  
100  $\mu\text{l}$  of 20 mM MES, 150 mM NaCl pH 6.0. As a control, 200  $\mu\text{g}$  of D-Ala-LTA was  
incubated in the same conditions without enzyme. After lyophilization, samples were treated  
765 with 48% hydrofluoric acid for 48h at 0°C, allowing LTA depolymerization without release of  
D-Ala esterified on Gro residues. Gro-D-Ala subunits and free D-Ala released from LTA chains

were analyzed by LC-MS using an UHPLC instrument (Vanquish Flex, Thermo Scientific) connected to a Q Exactive Focus mass spectrometer (Thermo Fisher Scientific). A reverse-phase column (Hypersyl Gold AQ C18 column; 200 by 2.1 mm; particule size 1.9  $\mu\text{m}$ ; 770 ThermoFischer Scientific) was used for separation. To enhance the retention and resolution of the column, heptafluorobutyric acid (HBFA) was used as an ion-pairing agent. Samples were diluted 20-fold in buffer A with 2  $\mu\text{l}$  injected onto the column. Buffer A contained 0.2% HBFA in MilliQ H<sub>2</sub>O and buffer B contained 0.2% HBFA in acetonitrile/MilliQ H<sub>2</sub>O (80:20, V/V). Elution was performed at flow rate 0.3 ml min<sup>-1</sup> using an isocratic step of buffer A for 3 min 775 followed by a gradient to 5% of buffer B in 5 min. Mass analysis was performed in single ion monitoring (SIM) mode by following Ala and Ala-Gro with the respective m/z of 90.05 and 164.09. Ala and Gro-Ala were identified by their MS and MS<sup>2</sup> spectra.

### Acknowledgments

780 The authors would like to thank Octobre Clocher, Dali Ma and Cathy Ramos for their contribution to the early stages of the bacteriology and *Drosophila* tasks of this project, Céline Freton for help in microscale thermophoresis, Laurane Bernelin for her contribution at the initial stages of the DltE production and crystallization and Emmanuel Maes and Jessica L. Davis for technical assistance. We acknowledge access to the ChemSyBio mass spectrometry 785 facilities, the SFR Biosciences (UAR3444/US8) for access to the Protein Science (crystallogenesis robots) and the ArthroTools platform (*Drosophila* facility) and support on the beamlines ID23-2 and ID30B at the European Synchrotron Radiation Facility (ESRF, Grenoble, France) and on PROXIMA-1 and PROXIMA-2A at SOLEIL synchrotron (Gif sur Yvette, France), the PAGes core facility (<http://plateforme-pages.univ-lille1.fr>) and UAR 2014 790 /US 41 (Plateformes Lilloises en Biologie & Santé) for providing the scientific and technical environment conducive to achieve this work. This work was funded by the collaborative grant ANR-18-CE15-0011 to FL, MPCC and CG. Work in the FL lab was also supported by a FRM grant (DEQ20180839196), a FINOVI starting grant to RCM and an ENSL Emergence grant to RCM. Work in the CG lab was also supported by the Fondation Bettencourt-Schueller.

795

### Authors contributions

FL, CG and MPCC supervised the work. RCM, SR, PC, YG, CG, MPCC and FL designed the experiments. NN, RCM, SR, PC, HA, SP, VGC, MSM, AG and YG performed the experiments.

NN, RCM, SR, PC, YG, MPCC, CG, and FL analyzed the results. RCM, SR, YG, MPCC, CG  
800 and FL wrote the manuscript.

## Figures

805

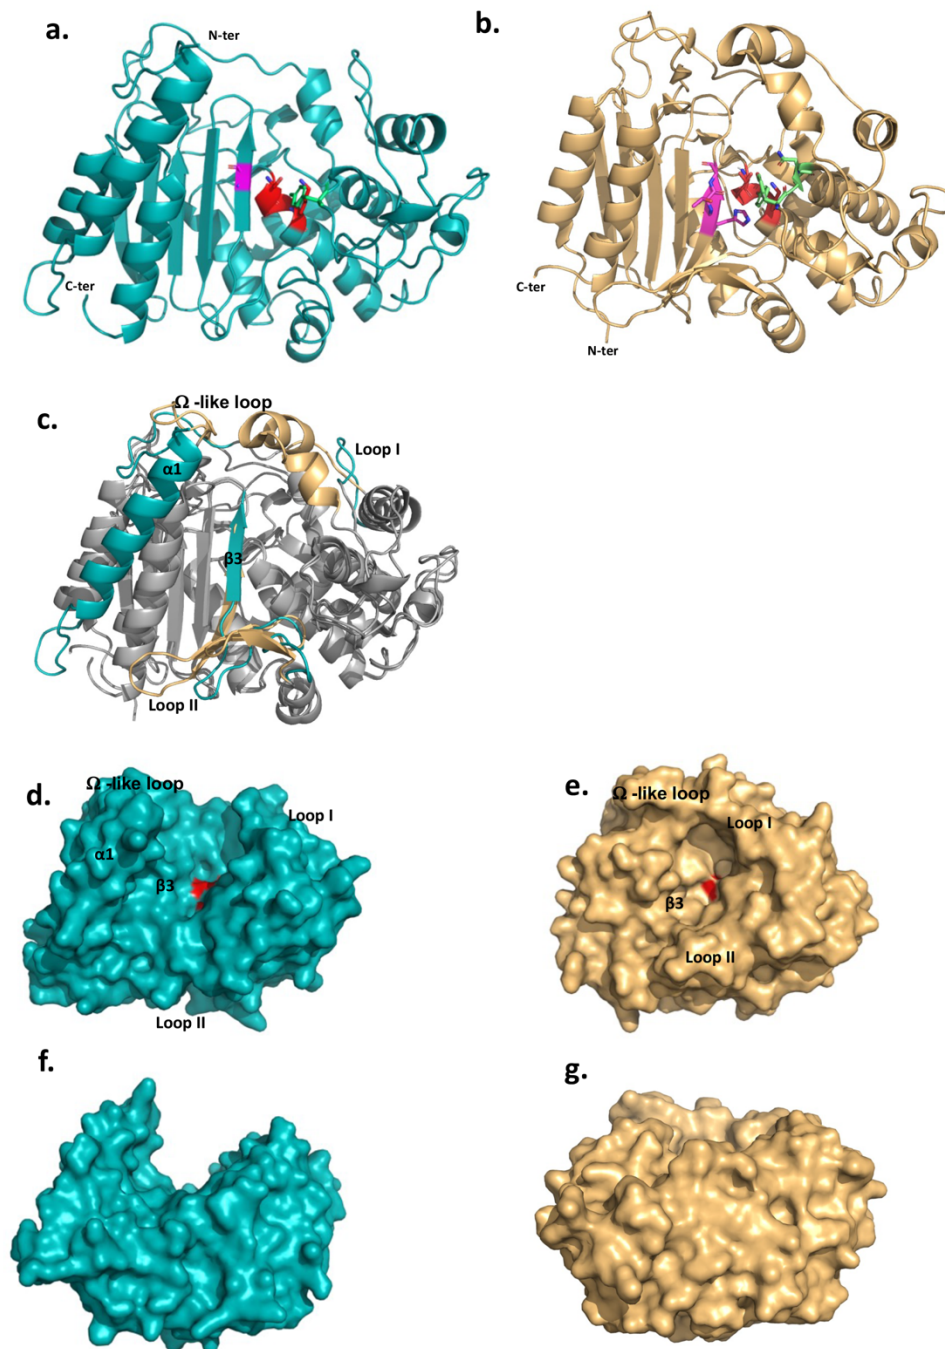

**Fig. 1. The 3D structures of *L. plantarum* DltE<sub>extra</sub> and its structural comparison with the *Streptomyces* R61 D-Ala-D-Ala carboxypeptidase structure.** **a**, Cartoon representations of the 3D X-ray structure of *L. plantarum* DltE<sub>extra</sub> and **b**, of the canonical D-Ala-D-Ala carboxypeptidase from *Streptomyces* sp R61 (DDCP) (PDB ID 1HVB/1IKG). The N- and C-termini are indicated. The canonical DDCP conserved motifs 1 (SXXK, with S the catalytic Ser), 2 (YXN) and 3 ((K/H)(S/T)G) are highlighted in red, green and pink, respectively. The first motif is strictly conserved in DltE (<sup>128</sup>SIQK<sup>131</sup>) and located as for DDCP at the beginning of the  $\alpha$ -helix rich region ( $\alpha$ 3 helix in DltE,  $\alpha$ 2 in DDCP) at the interface with the  $\beta$ -sheet. Only the Tyr and Gly residues are conserved in the motifs 2 and 3 respectively. The position of the catalytic Tyr213 from the second motif is also conserved and found in the loop connecting  $\alpha$ 5 and  $\alpha$ 6, close to the catalytic dyad. **c**, Superimposition between DltE<sub>extra</sub> and DDCP (PDB ID 1HVB/1IKG) 3D structures. The common structural cores which exhibit a classical  $\beta$ -lactamase fold or Penicillin binding (PB) fold are colored in grey. They are well superimposed with rms deviation calculated at 2.2 Å on around 300 residues. The main structural differences are highlighted in teal for DltE and wheat for DDCP and indicated on the figure: the N-terminal  $\alpha$ 1 helix of DltE, the  $\beta$ 3-strand that contains the motif 3, the Loop I, the Loop II and the  $\Omega$ -like loop. **d, f** and **e, g** Surface representation of DltE<sub>extra</sub> and DDCP. (**d, e**) and (**f, g**) are shown in the same orientation. (**f**) and (**g**) are rotated by 90° along a horizontal axis compared to **d** and **e** respectively. The catalytic Ser, colored in red is buried at the bottom of the catalytic cavity in DDCP and lying in the middle of a large cleft in DltE. The structural elements that define the active site architecture and differ between DltE and DDCP are indicated.



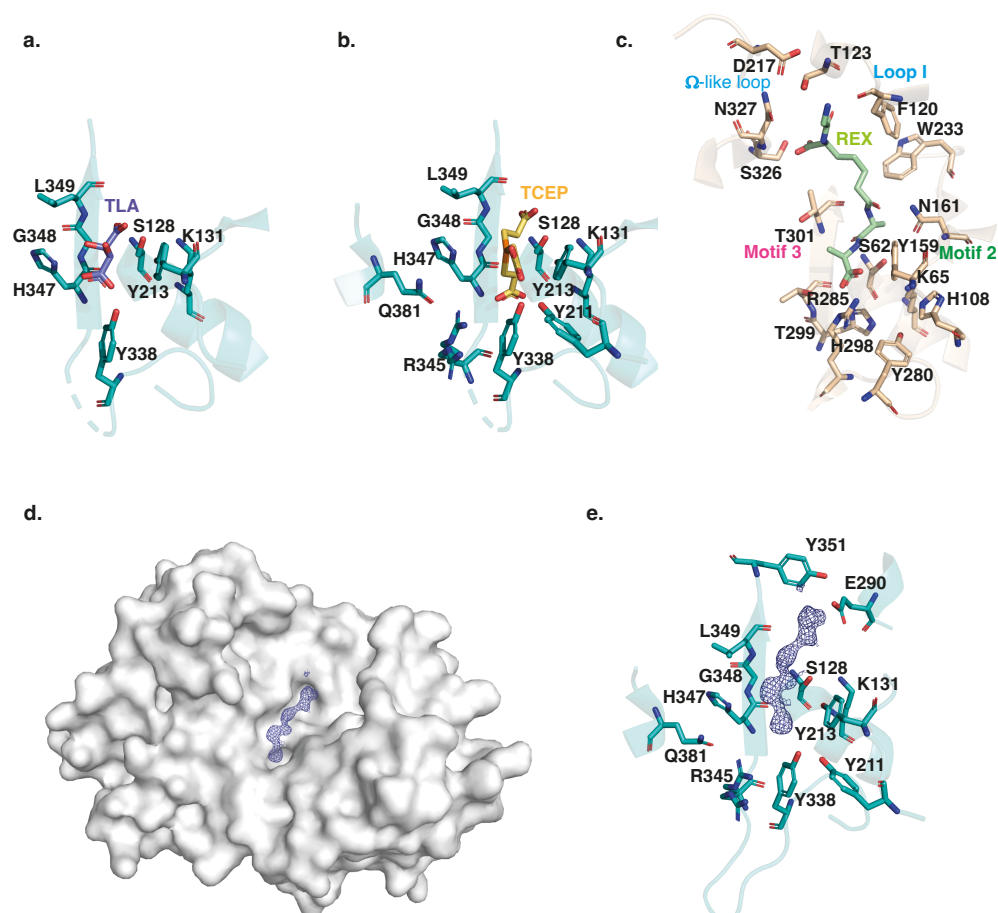

830

835

840

845

**Fig. 2. The substrate binding cleft of *L. plantarum* DltE.** Close-up on the ligand binding site of DltE<sub>extra</sub> crystallized in complex with a tartare (TLA) **a**, or TCEP (Tris(2-carboxyethyl)phosphine hydrochloride) **b**, molecule. The residues involved in the interactions are shown as sticks. The catalytic Ser128, with the hydroxyl group of its chain side is positioned at only 2.7 Å away from a carboxylic group of the ligand is itself hydrogen bonded to the catalytic Lys131 of the motif 1 and to Tyr213, the only conserved residue of the motif 2. The 3 residues of the β3-strand (<sup>347</sup>H-G-L<sup>349</sup>) including Gly348 from motif 3 delineate one side of the active site. Tyr338 establishes a strong, almost covalent, interaction with ligand carboxyl group that is also bound to Ser128. Three additional interactions specific to DltE are observed in the TCEP-bound structure and involved Tyr211, Arg345 and Gln381. **c**, Close-up on the ligand binding site of DDCCP in complex with fragment of the cell wall precursor (REX - glycyl-L-alpha-amino-epsilon-pimelyl-D-Ala-D-Ala) (PDB ID 1IKG). The residues involved in the interactions are shown as sticks. The catalytic Ser62 and Lys65 from motif 1 and Tyr159 from motif 2 are located in the vicinity of the last D-Ala moiety in positions similar to those observed in DltE. The rest of the substrate binding site differs significantly. The Arg285 conserved in

DDCP and responsible for the carboxypeptidase activity, recognizes the terminal carboxylate of the substrate. The interactions involving motif 2 and 3 stabilize the penultimate D-Ala residue. The hydrophobic subsite composed of Trp233 and Phe120 recognizes the aliphatic portion of the peptide and is also notably absent in DltE. Finally, H-bond interactions are established with the N-terminus of the peptide substrate at the level of the loop I and  $\Omega$ -like-loop. **d**, Surface representation of DltE structure obtained from crystal soaked with LTA molecules. A long electron density compatible with a 2-mer polyglycerol phosphate was observed lying in the catalytic cleft. **e**, Close-up on the interaction network around the backbone of the ligand modeled in the catalytic cleft. The interaction network that stabilizes the first half of the ligand is the same as the one described with the TCEP molecules. The second half of the electron density extends further on the catalytic cleft of DltE in the vicinity of Glu290 (in helix  $\alpha$ 9) and Tyr351 (between  $\beta$ 3 and  $\beta$ 4) that are not conserved in canonical DDCP.

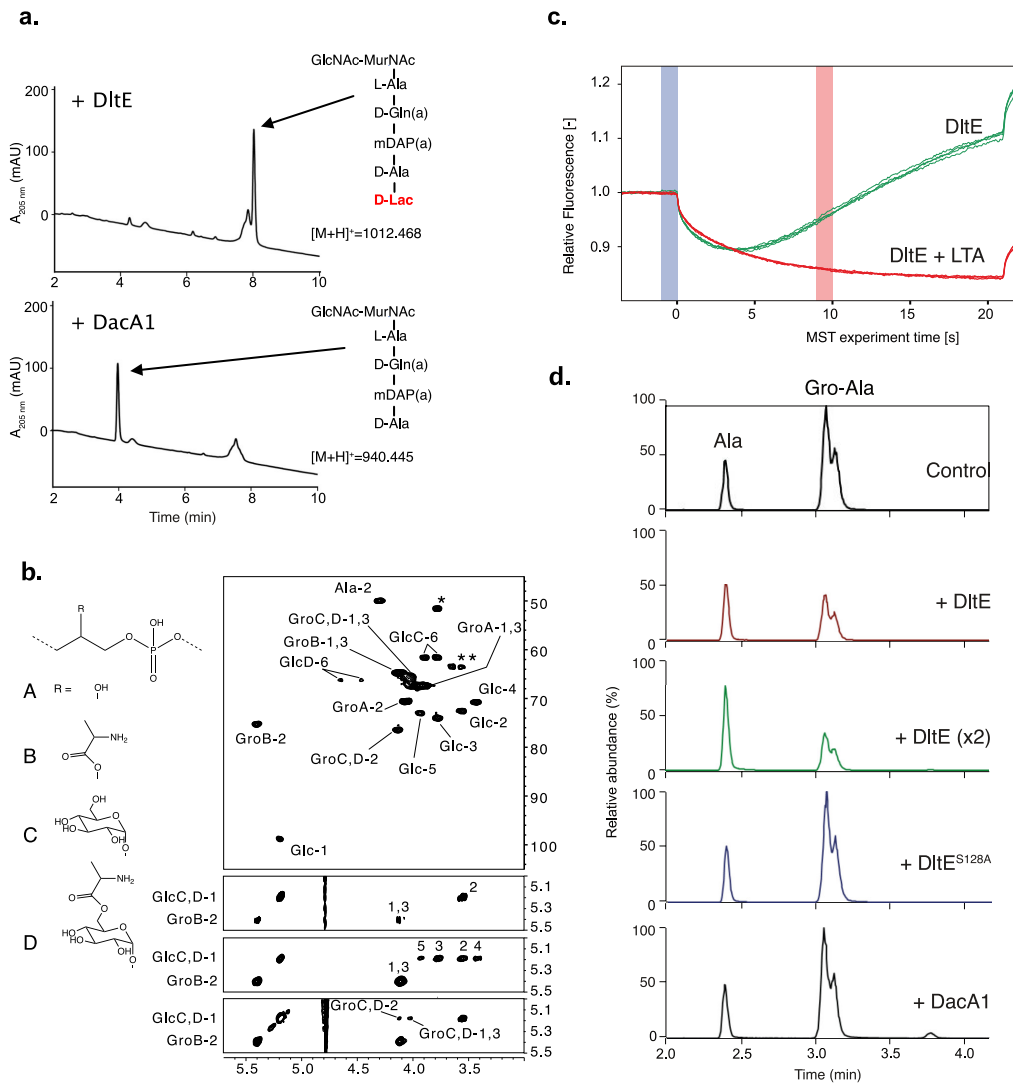



860 **Fig. 3. DltE is not active on peptidoglycan stem peptide but has D-Ala esterase activity on**  
**LTA.** **a**, Test of carboxylesterase activity of DltE on disaccharide-depsipentapeptide substrate.  
Purified enzymes (DltE or DacA1) were incubated with purified muropeptide and the mixture  
was analyzed by UHPLC. DacA1 taken as a control is able to release terminal D-Lac,  
generating disaccharide-tetrapeptide. Muropeptides were identified by mass spectrometry. **b**,  
865 Multidimensional NMR analysis of LTA isolated from WT *L. plantarum* established the  
presence of four major repeating units made of phospho-glycerol (Gro) differently substituted  
at C-2 position by -OH group (A), Ala- residue (B),  $\alpha$ Glc residues (C) or Ala-6- $\alpha$ Glc group  
(D). Individual spin systems of Glc residues C and D, Gro associated to A-D and Ala associated  
to GroB and GlcD were established from  $^1\text{H}$ - $^{13}\text{C}$  HSQC (top),  $^1\text{H}$ - $^1\text{H}$  COSY (second from top)  
870 and  $^1\text{H}$ - $^1\text{H}$  TOCSY (third from top) spectra in agreement with literature<sup>56</sup>.  $^1\text{H}$  and  $^{13}\text{C}$  chemical  
shifts are reported in Supplementary Table 2. Ala residue was typified according to the  $^1\text{H}/^{13}\text{C}$   
chemical shifts of C1 at  $\delta$  -172.5, C2 at  $\delta$  4.29/49.9 and C3 at  $\delta$  1.63/16.36 out of which only  
Ala-2 is visible on presented region of  $^1\text{H}$ - $^{13}\text{C}$  HSQC spectrum and Ala-1 was identified on  $^1\text{H}$ -  
 $^{13}\text{C}$  HMBC spectrum (not shown). Substitution of Gro by Ala in C-2 position is established  
875 owing to the very unshielded GroB-2 signal at  $\delta$  5.40/75.3. Substitution of GroC,D in C-2  
position was established owing to the deshielding of GroC,D-2  $^{13}\text{C}$  at  $\delta$  76.4 compared to  
unsubstituted GroA-2  $^{13}\text{C}$  at  $\delta$  70.6 and the  $^1\text{H}$ - $^1\text{H}$  NOESY cross signal between GlcC,D-1 and  
GroC,D-2 (bottom spectrum). Finally, Substitution of GlcD in C-6 position is observable on  
the  $^1\text{H}$ - $^{13}\text{C}$  HSQC spectrum by the strong deshielding of GlcD-6 at  $\delta$  4.45-4.63/66.2 compared  
880 to unsubstituted GlcC-6 at  $\delta$  3.77-3.88/61.5<sup>56</sup>. Such LTAs have never been identified in *L.*  
*plantarum*, but very similar repetition units were previously characterized in LTA and WTA  
isolated from *Lactobacillus brevis*<sup>56</sup>. However, in contrast to *L. brevis* in which WTA and LTA  
showed very similar Gro-based sequences, WTA and LTA from *L. plantarum* showed very  
different structures with repetition units based either on Rbo-phosphate for the former and on  
885 Gro-phosphate for the later. **c**, MST traces for DltE<sub>extra</sub> without and with purified LTA from  
*Lp*<sup>NC8</sup> added at a concentration of 500  $\mu\text{M}$ . Relative fluorescence change reveals binding of  
LTA to DltE<sub>extra</sub> (Fhot: fluorescence at the region defined as hot 10 s after IR laser heating,  
Fcold: fluorescence at the region defined as cold at 0 s). **d**, Test of D-Ala esterase activity of  
DltE on LTA from *Lp*<sup>NC8</sup>. Purified LTA (100  $\mu\text{g}$ ) was incubated with purified enzymes: DltE<sub>extra</sub>  
(100  $\mu\text{g}$  or 200  $\mu\text{g}$  (x2)), DltE<sub>extra</sub><sup>S128A</sup> (100  $\mu\text{g}$ ) or DacA1 (100  $\mu\text{g}$ ). Control corresponds to  
890 LTA incubated in the same conditions without enzyme. After LTA depolymerization by HF  
treatment, hydrolysis products were analyzed by LC-MS/MS. Ala and Gro-Ala were identified

by their m/z values (90.05 and 164.09, respectively) and MS-MS spectra (Extended Data Fig. 5). Gro-Ala was detected as a double peak, corresponding possibly to the migration of D-Ala from C2 to C1 of Gro<sup>55</sup>. A chromatogram of the combined extracted ion chromatograms of each target ion species was generated for each condition. Similar results were obtained in two independent experiments.

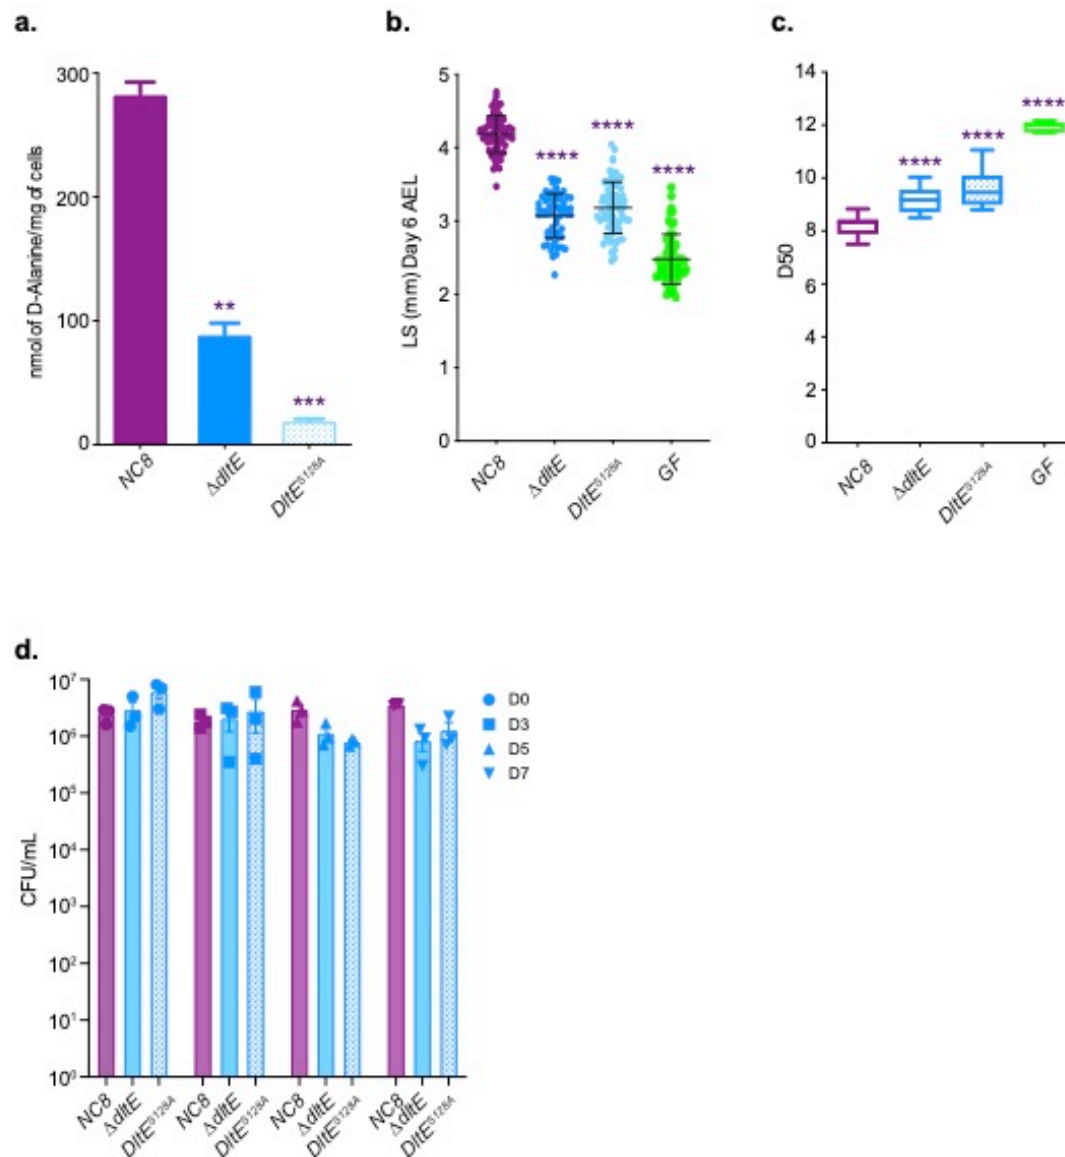

**Fig. 4. The D-Ala esterase activity of DltE contributes to D-alanylation of the cell envelope and is required to sustain *Drosophila* juvenile growth.** **a**, Amount of D-Ala released from whole cells of *Lp*<sup>NC8</sup>,  $\Delta dltE$  and *DltE*<sup>S128A</sup> by alkaline hydrolysis and quantified by HPLC. Mean values were obtained from three independent cultures with two injections for each. Purple asterisks illustrate statistically significant difference with D-Ala release from *Lp*<sup>NC8</sup>. \*\*\*: 0,0001<p<0,001; \*\*: 0,001<p<0,01. **b**, Larval longitudinal length after inoculation with *Lp*<sup>NC8</sup>,  $\Delta dltE$  and *DltE*<sup>S128A</sup> strains and PBS (for the GF condition). Larvae were collected 6 days after

association and measured as described in the Methods section. Purple asterisks illustrate statistically significant difference with larval size of  $Lp^{NC8}$ ; \*\*\*\*:  $p < 0,0001$ . Center values in the graph represent means and error bars represent SD. Representative graph from one out of three independent experiments. **c**, Day when fifty percent of pupae emerge during a developmental experiment (D50) for GF eggs associated with strains  $Lp^{NC8}$ ,  $\Delta dltE$  and  $DltE^{S128A}$  or PBS (for the GF condition). Center values in the graph represent means. Purple asterisks illustrate statistically significant difference with  $Lp^{NC8}$  larval size; \*\*\*\*:  $p < 0,0001$ . **d**, Evolution of the number of CFUs on fly food and larvae at days 3, 5, and 7 after inoculation with  $Lp^{NC8}$ ,  $\Delta dltE$  and  $DltE^{S128A}$ .

915

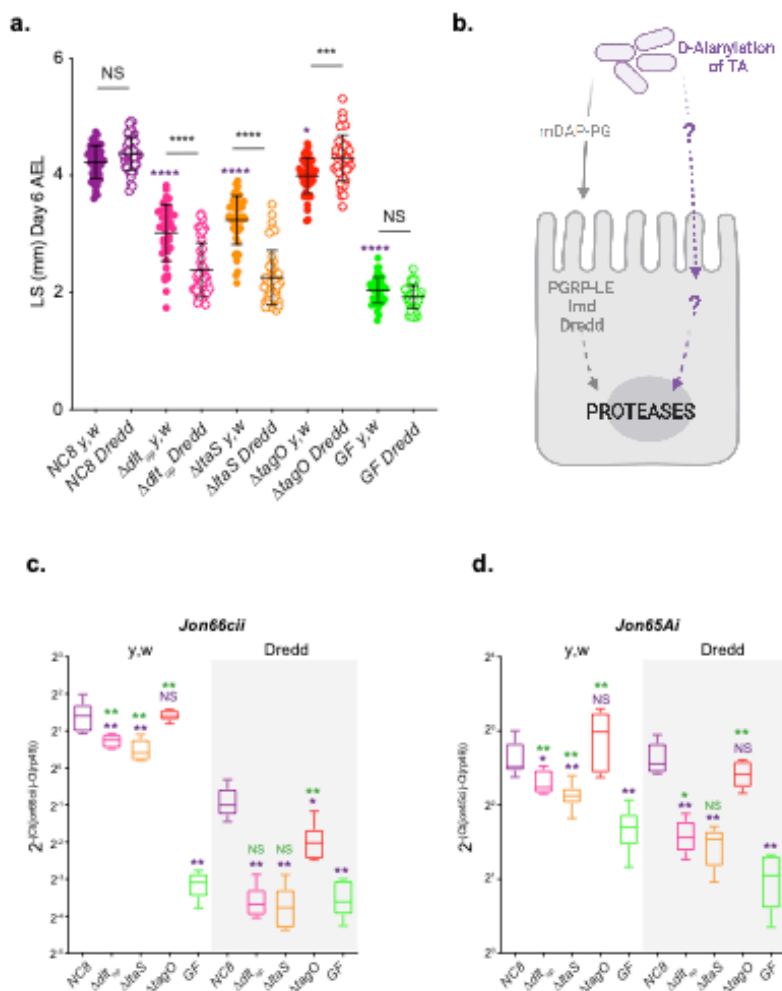

**Fig. 5. D-Ala-LTAs are necessary symbiotic cues supporting *Drosophila* intestinal response and juvenile growth.** **a**, *y,w* and *y,w,Dredd* larvae longitudinal length after inoculation with  $10^8$  CFUs of  $Lp^{NC8}$ ,  $\Delta dlt_{op}$ ,  $\Delta ltaS$  and PBS, for the germ-free condition. Larvae

920

were collected six days after association and measured as described in the Methods. The purple asterisks represent a statistically significant difference compared with *Lp*<sup>NC8</sup> larval size. The bars in the graph represent means and s.d. NS represents the absence of a statistically significant difference; \*\*\*\*P < 0.0001. Representative graph from one out of three independent experiments. **b**, Working model for *Lp* detection in *Drosophila* enterocytes: *Drosophila* sense and signal the presence of *Lp* cells through: (1) PGRP-LE-mediated mDAP-PG fragment recognition triggering Imd/Dredd signaling and, (2) sensing of bacterial cell envelope bearing D-alanylated teichoic acids and signaling by unknown host mechanisms. Both signals were reported to be important for maximal intestinal peptidase expression. **c, d**, Mean  $\pm$  s.d. of 2<sup>- $\Delta$ CTgene/ $\Delta$ CTrp49</sup> ratios for *Jon66Cii* and *Jon65Ai* detected in dissected guts of *y,w* and *y,w,Dredd* associated with *Lp*<sup>NC8</sup>,  $\Delta$ *dlt*<sub>op</sub>,  $\Delta$ *ltaS* or the GF condition from five biological replicates. Representative graphs from one out of three independent experiments are shown. The purple asterisks represent a statistically significant difference compared with *Lp*<sup>NC8</sup> proteases expression. The green asterisks represent a statistically significant difference compared with the GF condition. NS represents the absence of a statistically significant difference compared to the GF condition or *Lp*<sup>NC8</sup>. \*\*0.001 < P < 0.01; \*P < 0.05.

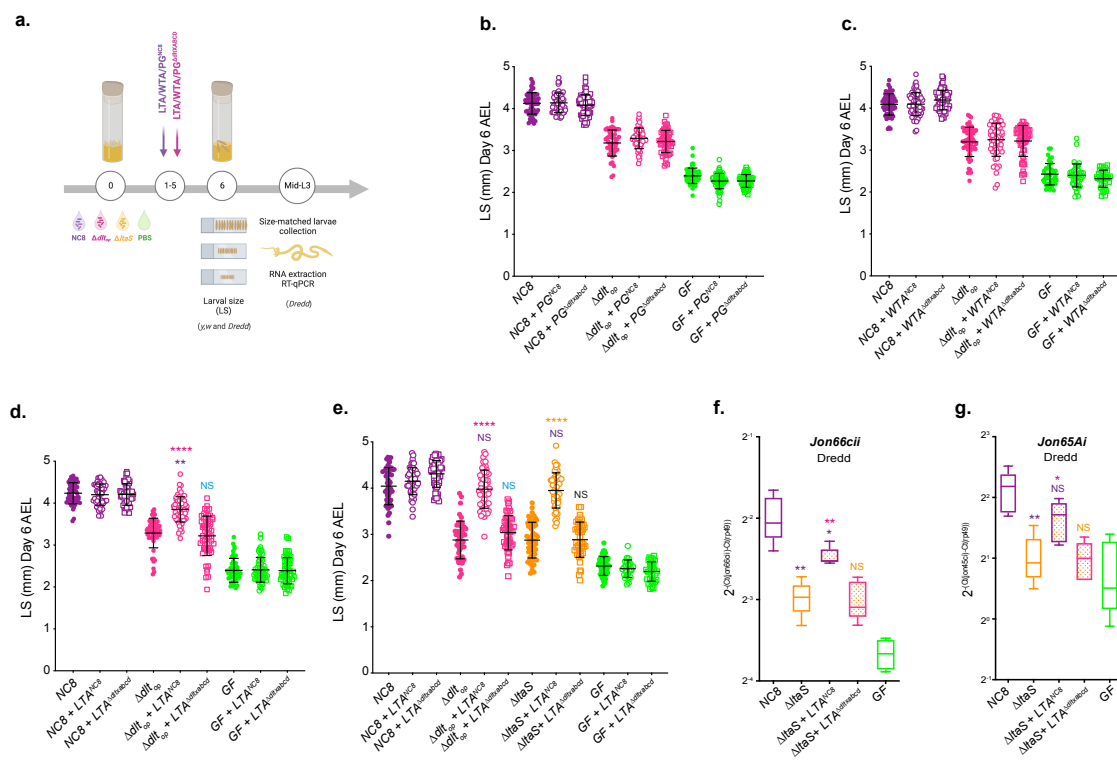

**Fig. 6. D-Ala LTAs are symbiotic cues supporting *Drosophila* intestinal response and juvenile growth.** **a**, Experimental set-up to test the impact of cell envelope components on

*Drosophila* growth and proteases expression: germ-free eggs were inoculated with  $Lp^{NC8}$ ,  $\Delta dlt_{op}$ ,  $\Delta ltaS$  or PBS, for the germ-free condition and supplemented daily (for 5 days) with LTA, WTA and PG extracted from  $Lp^{NC8}$  or  $\Delta dltXABCD$  strains. 1  $\mu$ g of each component purified from  $Lp^{NC8}$  was used. For comparison with components extracted  $\Delta dltXABCD$  strain, the final  
945 PG, WTA and LTA suspensions were adjusted to the same amount of Gro, Rbo and Mur respectively. At day 6 after inoculation, larvae were harvested and measured (see the Methods section for details). Mid-L3 sized-matched larvae were collected for each condition. Their guts were dissected followed by RNA extraction and RT-qPCR targeting proteases expression. **b, c, d**, Larval longitudinal length after inoculation with strains  $Lp^{NC8}$ ,  $\Delta dlt_{op}$ , PBS and purified peptidoglycan (PG) (**b**) wall teichoic acids (WTA) (**c**) or lipoteichoic acids (LTA) (**d**) from  
950  $Lp^{NC8}$  or  $\Delta dltXABCD$ . Larvae were collected six days after the first association and measured as described in the Methods. The pink asterisks represent a statistically significant difference compared with  $\Delta dlt_{op}$  larval size; violet asterisks represent a statistically significant difference compared with  $Lp^{NC8}$  larval size. NS represents the absence of a statistically significant difference compared to  $\Delta dlt_{op}$ . \*\*\*\*P < 0.0001; \*\*0.001 < P < 0.01. The bars in the graph represent means and s.d. A representative graph from one out of three independent experiments is shown. **e**, Larval longitudinal length after inoculation with strains  $Lp^{NC8}$ ,  $\Delta dlt_{op}$ ,  $\Delta ltaS$  or PBS and purified lipoteichoic acid (LTA) from  $Lp^{NC8}$  or  $\Delta dltXABCD$  strains. Larvae were collected  
960 six days after the first association and measured as described in the Methods. The pink asterisks represent a statistically significant difference compared with  $\Delta dlt_{op}$  larval size; Violet asterisks represent a statistically significant difference compared with  $Lp^{NC8}$  larval size \*\*\*\*P < 0.0001; \*\*0.001 < P < 0.01. The bars in the graph represent means and s.d. A representative graph from one out of three independent experiments is shown. **f, g**, Mean  $\pm$  s.d. of  $2^{-\Delta Ct_{gene}/\Delta Ctrp49}$  ratios for *Jon66Cii* and *Jon65Ai* detected in dissected guts of *y,w,Dredd* size-matched larvae, associated with  $Lp^{NC8}$ ,  $\Delta dlt_{op}$ ,  $\Delta ltaS$  or the GF and LTA from  $Lp^{NC8}$  or  $\Delta dltXABCD$  strains, from  
965 five biological replicates. Representative graphs from one out of three independent experiments are shown. The purple asterisks represent a statistically significant difference compared with  $Lp^{NC8}$  protease expression. The pink asterisks represent a statistically significant difference compared with  $\Delta ltaS$  supplemented with LTA from  $\Delta dltXABCD$  strain. NS represents the absence of a statistically significant difference compared to  $\Delta ltaS$  condition. \*\*0.001 < P < 0.01; \*P < 0.05.

## 975 **References**

1. McFall-Ngai, M. *et al.* Animals in a bacterial world, a new imperative for the life sciences. *Proc National Acad Sci* 110, 3229–3236 (2013).
2. Schwarzer, M., Strigini, M. & Leulier, F. Gut microbiota and host juvenile growth. *Calcified Tissue Int* 102, 387–405 (2018).
- 980 3. Nabwera, H. M., Mwangome, M. K. & Prentice, A. M. Stunting of growth in developing countries. *Nestle Nutr Works Se* 125, 14–27 (2022).
4. Subramanian, S. *et al.* Persistent gut microbiota immaturity in malnourished Bangladeshi children. *Nature* 510, 417–421 (2014).
- 985 5. Barratt, M. J., Ahmed, T. & Gordon, J. I. Gut microbiome development and childhood undernutrition. *Cell Host Microbe* 30, 617–626 (2022).
6. Douglas, A. E. The *Drosophila* model for microbiome research. *Lab Animal* 47, 157–164 (2018).
7. Grenier, T. & Leulier, F. How commensal microbes shape the physiology of *Drosophila melanogaster*. *Curr Opin Insect Sci* 41, 92–99 (2020).
8. Kim, S. K., Tsao, D. D., Suh, G. S. B. & Miguel-Aliaga, I. Discovering signaling mechanisms governing metabolism and metabolic diseases with *Drosophila*. *Cell Metab* (2021) doi:10.1016/j.cmet.2021.05.018.
- 990 9. Shin, S. C. *et al.* *Drosophila* microbiome modulates host developmental and metabolic homeostasis via insulin signaling. *Science* 334, 670–674 (2011).
10. Kamareddine, L., Robins, W. P., Berkey, C. D., Mekalanos, J. J. & Watnick, P. I. The *Drosophila* Immune Deficiency Pathway modulates enteroendocrine function and host metabolism. *Cell Metab* 28, 449–462.e5 (2018).
- 995 11. Jugder, B.-E., Kamareddine, L. & Watnick, P. I. Microbiota-derived acetate activates intestinal innate immunity via the Tip60 histone acetyltransferase complex. *Immunity* 54, 1683–1697.e3 (2021).
- 1000 12. Storelli, G. *et al.* *Lactobacillus plantarum* promotes *Drosophila* systemic growth by modulating hormonal signals through TOR-dependent nutrient sensing. *Cell Metab* 14, 403–414 (2011).
13. Erkosar, B. *et al.* Pathogen virulence impedes mutualist-mediated enhancement of host juvenile growth via inhibition of protein digestion. *Cell Host Microbe* 18, 445–455 (2015).
14. Matos, R. C. *et al.* d-Alanylation of teichoic acids contributes to *Lactobacillus plantarum*-mediated *Drosophila* growth during chronic undernutrition. *Nat Microbiol* 2, 1–15 (2017).
- 1005 15. Ferain, T. *et al.* Knockout of the two *ldh* genes has a major impact on peptidoglycan precursor synthesis in *Lactobacillus plantarum*. *Journal of Bacteriology* (1996).
16. Perego, M. *et al.* Incorporation of D-alanine into lipoteichoic acid and wall teichoic acid in *Bacillus subtilis*. Identification of genes and regulation. *J Biol Chem* 270, 15598–15606 (1995).
- 1010 17. Nikolopoulos, N. *et al.* DltC acts as an interaction hub for AcpS, DltA and DltB in the teichoic acid d-alanylation pathway of *Lactiplantibacillus plantarum*. *Sci Rep* 12, 13133 (2022).
18. Rohde, M. The Gram-Positive Bacterial Cell Wall. *Microbiol Spectr* 7, (2019).
19. McDonough, M. A. *et al.* Structures of two kinetic intermediates reveal species specificity of penicillin-binding proteins. *J Mol Biol* 322, 111–122 (2002).
- 1015 20. Kelly, J. A. *et al.* On the origin of bacterial resistance to penicillin: comparison of a  $\beta$ -Lactamase and a penicillin target. *Science* 231, 1429–1431 (1986).
21. Fetrow, J. S. Omega loops; nonregular secondary structures significant in protein function and stability. *Faseb J* 9, 708–717 (1995).
22. Yi, H. *et al.* High adaptability of the omega loop underlies the substrate-spectrum-extension evolution of a class A  $\beta$ -lactamase, PenL. *Sci Rep* 6, 36527 (2016).
- 1020 23. Morlot, C. *et al.* Crystal structure of a peptidoglycan synthesis regulatory factor (PBP3) from *Streptococcus pneumoniae* \*. *J Biol Chem* 280, 15984–15991 (2005).
24. Bernard, E. *et al.* Characterization of O-Acetylation of N-Acetylglucosamine: a novel structural variation of bacterial peptidoglycan. *J Biol Chem* 286, 23950–23958 (2011).
- 1025 25. Gründling, A. & Schneewind, O. Synthesis of glycerol phosphate lipoteichoic acid in *Staphylococcus aureus*. *Proc National Acad Sci* 104, 8478–8483 (2007).
26. Andre, G. *et al.* Fluorescence and atomic force microscopy imaging of wall teichoic acids in *Lactobacillus plantarum*. *Acs Chem Biol* 6, 366–376 (2011).



- 1030 27. Webb, A. J., Karatsa-Dodgson, M. & Gründling, A. Two-enzyme systems for glycolipid and polyglycerolphosphate lipoteichoic acid synthesis in *Listeria monocytogenes*. *Mol Microbiol* 74, 299–314 (2009).
28. Leulier, F., Rodriguez, A., Khush, R. S., Abrams, J. M. & Lemaitre, B. The *Drosophila* caspase Dredd is required to resist gram-negative bacterial infection. *Embo Rep* 1, 353–358 (2000).
- 1035 29. Leulier, F. *et al.* The *Drosophila* immune system detects bacteria through specific peptidoglycan recognition. *Nat Immunol* 4, 478–484 (2003).
30. Rahman, M. M. *et al.* The *Staphylococcus aureus* methicillin resistance factor FmtA Is a D-Amino Esterase that acts on teichoic acids. *Mbio* 7, e02070-15 (2016).
31. Sutcliffe, I. C. Priming and elongation: dissection of the lipoteichoic acid biosynthetic pathway in Gram-positive bacteria. *Mol Microbiol* 79, 553–556 (2011).
- 1040 32. Percy, M. G. & Gründling, A. Lipoteichoic acid synthesis and function in gram-positive bacteria. *Annu Rev Microbiol* 68, 81–100 (2014).
33. Bron, P. A. *et al.* *Lactobacillus plantarum* possesses the capability for wall teichoic acid backbone alditol switching. *Microb Cell Fact* 11, 1–1 (2012).
- 1045 34. Martino, M. E. *et al.* Nomadic lifestyle of *Lactobacillus plantarum* revealed by comparative genomics of 54 strains isolated from different habitats. *Environ Microbiol* 18, 4974–4989 (2016).
35. Lemaitre, B. & Miguel-Aliaga, I. The Digestive Tract of *Drosophila melanogaster*. *Annu Rev Genet* 47, 130909162859001 (2012).
36. Neuhaus, F. C. & Baddiley, J. A continuum of anionic charge: structures and functions of D-Alanyl-Teichoic Acids in Gram-Positive bacteria. *Microbiol Mol Biol R* 67, 686–723 (2003).
- 1050 37. Grenier, T. *et al.* Intestinal GCN2 controls *Drosophila* systemic growth in response to *Lactiplantibacillus plantarum* symbiotic cues encoded by r/tRNA operons. *Biorxiv* 2021.10.31.466661 (2021) doi:10.1101/2021.10.31.466661.
- 1055 38. Champagne-Jorgensen, K., Mian, M. F., Neufeld, K.-A. M., Stanisiz, A. M. & Bienenstock, J. Membrane vesicles of *Lactocaseibacillus rhamnosus* JB-1 contain immunomodulatory lipoteichoic acid and are endocytosed by intestinal epithelial cells. *Sci Rep-uk* 11, 13756 (2021).
39. Schwarzer, M. *et al.* *Lactobacillus plantarum* strain maintains growth of infant mice during chronic undernutrition. *Science* 351, 854–857 (2016).
40. Hara, H. *et al.* The NLRP6 inflammasome recognizes lipoteichoic acid and regulates gram-positive pathogen infection. *Cell* 175, 1651-1664.e14 (2018).
- 1060 41. Maguin, E., Prevost, H., Ehrlich, S. D. & Gruss, A. Efficient insertional mutagenesis in lactococci and other gram-positive bacteria. *J Bacteriol* 178, 931–935 (1996).
42. Schneider, C. A., Rasb, Wayne S & Eliceiri, K. W. NIH Image to ImageJ: 25 years of image analysis. *Nat Methods* 9, 671–675 (2012).
- 1065 43. Kabsch, W. Integration, scaling, space-group assignment and post-refinement. *Acta Crystallogr Sect D Biological Crystallogr* 66, 133–144 (2010).
44. Adams, P. D. *et al.* PHENIX: a comprehensive Python-based system for macromolecular structure solution. *Acta Crystallogr Sect D Biological Crystallogr* 66, 213–21 (2010).
45. Arima, J. *et al.* Crystal structure of d-stereospecific amidohydrolase from *Streptomyces* sp. 82F2 – insight into the structural factors for substrate specificity. *Febs J* 283, 337–349 (2016).
- 1070 46. Emsley, P., Lohkamp, B., Scott, W. G. & Cowtan, K. Features and development of Coot. *Acta Crystallogr Sect D Biological Crystallogr* 66, 486–501 (2010).
47. Murshudov, G. N., Vagin, A. A. & Dodson, E. J. Refinement of macromolecular structures by the maximum-likelihood method. *Acta Crystallogr Sect D Biological Crystallogr* 53, 240–255 (1997).
- 1075 48. Chen, V. B. *et al.* MolProbity: all-atom structure validation for macromolecular crystallography. *Acta Crystallogr Sect D Biological Crystallogr* 66, 12–21 (2010).
49. Pettersen, E. F. *et al.* UCSF ChimeraX: Structure visualization for researchers, educators, and developers. *Protein Sci* 30, 70–82 (2021).
50. Robert, X. & Gouet, P. Deciphering key features in protein structures with the new ENDscript server. *Nucleic Acids Res* 42, W320–W324 (2014).
- 1080 51. Jerabek-Willemsen, M., Wienken, C. J., Braun, D., Baaske, P. & Duhr, S. Molecular interaction studies using microscale thermophoresis. *Assay Drug Dev Techn* 9, 342–353 (2011).

52. Kovacs, M. *et al.* A functional *dlt* operon, encoding proteins required for incorporation of d-alanine in teichoic acids in gram-positive bacteria, confers resistance to cationic antimicrobial peptides in *Streptococcus pneumoniae*. *J Bacteriol* 188, 5797–5805 (2006).
- 1085 53. Tomita, S. *et al.* Structures of two monomeric units of teichoic acid prepared from the cell wall of *Lactobacillus plantarum* NRIC 1068. *Biosci Biotechnology Biochem* 73, 530–535 (2009).
54. Engelhardt, H. & Ohs, P. Trace analysis of sugars by HPLC and post-column derivatization. *Chromatographia* 23, 657–662 (1987).
- 1090 55. Morath, S., Geyer, A. & Hartung, T. Structure–Function Relationship of Cytokine Induction by Lipoteichoic Acid from *Staphylococcus aureus*. *Journal of Experimental Medecin* 193, 393–397 (2001).
56. Carballo, P. M. S., Vilen, H., Palva, A. & Holst, O. Structural characterization of teichoic acids from *Lactobacillus brevis*. *Carbohyd Res* 345, 538–542 (2010).
